# Supplementary material for: Socioeconomic status, mental health, and nutrition are the principal traits for low back pain phenotyping: Data from the osteoarthritis initiative
Source: PubMed Central journal article supplement — JOR Spine. 2023 Feb 14;6(2):e1248. doi: 10.1002/jsp2.1248 (PMC10285761; doi:10.1002/jsp2.1248), 2023-02-14
Supplement: JSP2-6-e1248-s001.pdf [file JSP2-6-e1248-s001.pdf]

**Supplementary Table 3. Statistical comparisons to determine differences between clusters: ordinal variables**

Variables in gray met significance and fold change criteria. Comparisons were performed with Kruskal Wallis test. Post-hoc comparisons were performed with the Wilcoxon Rank Sum test. P values displayed here have not been adjusted.

| Variable   | Description                                                                                                                                          | % Complete | <i>P</i> value | <i>P</i> <sub>1</sub><br>C1 vs. C2 | <i>P</i> <sub>2</sub><br>C1 vs. C3 | <i>P</i> <sub>3</sub><br>C2 vs. C3 | <i>Fold Change</i><br>C1 vs. C2/C3 | <i>Fold Change</i><br>C2 vs. C1/C3 | <i>Fold Change</i><br>C3 vs. C1/C2 |
|------------|------------------------------------------------------------------------------------------------------------------------------------------------------|------------|----------------|------------------------------------|------------------------------------|------------------------------------|------------------------------------|------------------------------------|------------------------------------|
| V00INCOME  | Yearly income (calc)                                                                                                                                 | 88.8       | 2.4E-11        | 6.9E-04                            | 6.8E-10                            | 3.1E-06                            | 1.43                               | 1.10                               | 0.59                               |
| V00EDCV    | Highest grade or year of school completed (calc)                                                                                                     | 99.5       | 1.5E-10        | 9.9E-05                            | 1.3E-09                            | 1.2E-03                            | 1.51                               | 1.00                               | 0.62                               |
| V00CESD17  | CES-D: how often had crying spells, past week                                                                                                        | 98.1       | 4.9E-10        | 7.7E-01                            | 2.6E-08                            | 6.6E-06                            | 0.77                               | 0.80                               | 1.55                               |
| V00SF4     | SF-12: how often physical health result in accomplishing less than would like with work or other activities, past 4 weeks                            | 100.0      | 1.1E-09        | 2.0E-02                            | 1.3E-09                            | 3.2E-05                            | 1.40                               | 1.09                               | 0.62                               |
| V00SF6     | SF-12: how often emotional problems result in accomplishing less than would like with work or other activities, past 4 weeks                         | 99.5       | 1.4E-09        | 3.1E-01                            | 3.2E-09                            | 8.6E-07                            | 1.26                               | 1.16                               | 0.65                               |
| V00FFQ24   | Block Brief 2000: green salad, eat how often, past 12 months                                                                                         | 100.0      | 5.1E-09        | 5.9E-01                            | 4.6E-07                            | 1.2E-08                            | 1.18                               | 1.28                               | 0.62                               |
| V00SF5     | SF-12: how often physical health result in being limited in kind of work or other activities, past 4 weeks                                           | 100.0      | 2.2E-08        | 1.2E-02                            | 1.4E-07                            | 7.9E-05                            | 1.38                               | 1.06                               | 0.65                               |
| V00CESD9   | CES-D: how often thought my life had been a failure, past week                                                                                       | 98.1       | 5.2E-08        | 2.1E-01                            | 9.2E-08                            | 2.4E-04                            | 0.73                               | 0.82                               | 1.58                               |
| V00CESD7   | CES-D: how often felt that everything did was an effort, past week                                                                                   | 98.6       | 7.8E-08        | 6.1E-01                            | 2.0E-07                            | 7.4E-06                            | 0.74                               | 0.80                               | 1.60                               |
| V00CESD6   | CES-D: how often felt depressed, past week                                                                                                           | 98.6       | 1.4E-07        | 5.5E-01                            | 3.5E-07                            | 2.7E-05                            | 0.73                               | 0.79                               | 1.64                               |
| V00FFQ9    | Block Brief 2000: apples/pears, eat how often, past 12 months                                                                                        | 100.0      | 2.2E-07        | 5.0E-03                            | 9.4E-03                            | 1.1E-07                            | 1.03                               | 1.42                               | 0.65                               |
| V00CESD2   | CES-D: how often did not feel like eating, appetite was poor, past week                                                                              | 99.5       | 6.1E-07        | 9.5E-02                            | 5.5E-07                            | 1.1E-03                            | 0.74                               | 0.85                               | 1.52                               |
| V00FFQ37   | Block Brief 2000: fried chicken, at home or in a restaurant, eat how often, past 12 months                                                           | 99.1       | 3.5E-06        | 4.1E-05                            | 1.7E-04                            | 1.0E+00                            | 0.66                               | 1.20                               | 1.22                               |
| V00CESD13  | CES-D: how often talked less than usual, past week                                                                                                   | 96.7       | 4.4E-06        | 2.0E-01                            | 4.3E-06                            | 1.3E-03                            | 0.73                               | 0.85                               | 1.54                               |
| V00FFQ7    | Block Brief 2000: yogurt (not frozen yogurt), eat how often, past 12 months                                                                          | 100.0      | 2.2E-05        | 2.4E-02                            | 1.5E-02                            | 3.3E-05                            | 1.01                               | 1.57                               | 0.58                               |
| V00FFQ71   | Block Brief 2000: wine/wine coolers, drink how often, past 12 months                                                                                 | 100.0      | 3.8E-05        | 2.8E-02                            | 7.1E-05                            | 3.1E-02                            | 1.50                               | 0.97                               | 0.65                               |
| V00MVIT1CV | Block Brief 2000: Regular Once-A-Day, Centrum or Thera type multivitamins, how often past 12 months (calc)                                           | 99.5       | 6.7E-05        | 1.0E+00                            | 6.8E-04                            | 6.8E-05                            | 1.18                               | 1.27                               | 0.63                               |
| V00SF12    | SF-12: how often physical health or emotional problems interfered with social activities (like visiting with friends, relatives, etc.), past 4 weeks | 99.1       | 6.1E-13        | 4.6E-06                            | 2.7E-11                            | 8.9E-05                            | 1.37                               | 1.03                               | 0.68                               |
| V00SF8     | SF-12: how much did pain interfere with normal work (include work outside home and housework), past 4 weeks                                          | 98.6       | 1.4E-10        | 5.8E-03                            | 4.7E-10                            | 7.8E-06                            | 0.77                               | 0.95                               | 1.34                               |
| V00SF10    | SF-12: how often had a lot of energy, past 4 weeks                                                                                                   | 100.0      | 2.6E-10        | 1.9E-03                            | 1.9E-09                            | 3.0E-05                            | 0.77                               | 0.94                               | 1.34                               |
| V00SF1     | SF-12: in general, how is health                                                                                                                     | 100.0      | 1.0E-09        | 6.4E-06                            | 7.0E-08                            | 2.6E-02                            | 0.77                               | 1.02                               | 1.25                               |
| V00SF2     | SF-12: how much health limit involvement in moderate activities (e.g., moving a table, pushing vacuum cleaner...)                                    | 100.0      | 2.3E-08        | 2.5E-03                            | 1.6E-07                            | 6.5E-04                            | 1.35                               | 1.02                               | 0.69                               |
| V00SF7     | SF-12: how often emotional problems result in not doing work or activities as carefully as usual, past 4 weeks                                       | 99.5       | 5.1E-08        | 2.6E-01                            | 9.2E-08                            | 1.6E-05                            | 1.21                               | 1.12                               | 0.72                               |
| V00FFQ11   | Block Brief 2000: applesauce/fruit cocktail/any canned fruit, eat how often, past 12 months                                                          | 100.0      | 2.2E-07        | 1.4E-07                            | 3.9E-01                            | 9.7E-03                            | 0.76                               | 1.39                               | 0.92                               |
| V00SF3     | SF-12: how much health limit climbing several flights of stairs                                                                                      | 100.0      | 4.2E-07        | 1.1E-01                            | 1.3E-06                            | 5.7E-05                            | 1.31                               | 1.09                               | 0.68                               |
| V00CESD5   | CES-D: how often had trouble keeping mind on what was doing, past week                                                                               | 99.1       | 1.9E-06        | 6.6E-02                            | 1.4E-06                            | 3.1E-03                            | 0.74                               | 0.92                               | 1.42                               |
| V00FFQ38   | Block Brief 2000: chicken/turkey not fried (e.g., baked/grilled/on sandwiches), eat how often, past 12 months                                        | 99.5       | 2.8E-06        | 1.4E-03                            | 6.9E-02                            | 8.4E-06                            | 0.99                               | 1.27                               | 0.78                               |
| V00CESD16  | CES-D: how often enjoyed life, past week                                                                                                             | 99.1       | 3.1E-06        | 4.7E-02                            | 2.0E-06                            | 6.3E-03                            | 1.23                               | 1.06                               | 0.76                               |
| V00CESD20  | CES-D: how often could not get going, past week                                                                                                      | 99.1       | 3.4E-06        | 4.4E-01                            | 4.3E-06                            | 2.9E-04                            | 0.77                               | 0.87                               | 1.45                               |

|            |                                                                                                                   |       |         |         |         |         |      |      |      |
|------------|-------------------------------------------------------------------------------------------------------------------|-------|---------|---------|---------|---------|------|------|------|
| V00FFQ2    | Block Brief 2000: bacon/breakfast sausage (including sausage biscuit), eat how often, past 12 months              | 100.0 | 6.0E-06 | 1.9E-04 | 1.4E-04 | 6.8E-01 | 0.68 | 1.10 | 1.28 |
| V00FFQ22   | Block Brief 2000: spinach/greens (e.g., collards), eat how often, past 12 months                                  | 100.0 | 6.1E-06 | 9.4E-05 | 1.0E+00 | 1.3E-04 | 0.89 | 1.34 | 0.82 |
| V00FFQ29   | Block Brief 2000: vegetable soup/vegetable beef, chicken vegetable or tomato soup, eat how often, past 12 months  | 100.0 | 7.0E-06 | 2.0E-02 | 2.6E-03 | 3.1E-05 | 1.05 | 1.30 | 0.71 |
| V00FFQ25   | Block Brief 2000: raw tomatoes (including in salad), eat how often, past 12 months                                | 100.0 | 7.6E-06 | 1.5E-01 | 2.9E-03 | 2.6E-06 | 1.07 | 1.28 | 0.71 |
| V00FFQ19   | Block Brief 2000: green beans/green peas, eat how often, past 12 months                                           | 100.0 | 1.5E-05 | 6.4E-03 | 4.9E-02 | 3.2E-05 | 1.00 | 1.25 | 0.78 |
| V00SF11    | SF-12: how often felt downhearted and depressed, past 4 weeks                                                     | 100.0 | 1.5E-05 | 6.0E-01 | 1.8E-05 | 6.0E-04 | 1.16 | 1.10 | 0.78 |
| V00CESD4   | CES-D: how often felt just as good as other people, past week                                                     | 96.3  | 2.0E-05 | 1.0E+00 | 2.9E-05 | 8.5E-04 | 1.16 | 1.11 | 0.76 |
| V00FFQ21   | Block Brief 2000: carrots/stews or mixed vegetables containing carrots, eat how often, past 12 months             | 100.0 | 2.3E-05 | 1.0E+00 | 4.3E-04 | 1.7E-05 | 1.13 | 1.21 | 0.71 |
| V00CESD14  | CES-D: how often felt lonely, past week                                                                           | 99.1  | 2.6E-05 | 7.6E-02 | 2.0E-05 | 1.6E-02 | 0.72 | 0.90 | 1.47 |
| V00FFQ17   | Block Brief 2000: baked beans/chili with beans/pintos/any other dried beans, eat how often, during past 12 months | 100.0 | 3.0E-05 | 1.1E-04 | 1.0E+00 | 1.7E-03 | 0.90 | 1.30 | 0.84 |
| V00FFQ68   | Block Brief 2000: cream/half and half/non-dairy creamer in coffee or tea, drink how often, past 12 months         | 100.0 | 6.3E-05 | 4.1E-05 | 5.1E-01 | 8.3E-02 | 0.72 | 1.45 | 0.92 |
| V00FFQ23   | Block Brief 2000: cole slaw/cabbage, eat how often, past 12 months                                                | 100.0 | 6.6E-05 | 2.0E-02 | 6.9E-02 | 7.9E-05 | 1.01 | 1.30 | 0.74 |
| V00FFQ20   | Block Brief 2000: broccoli, eat how often, past 12 months                                                         | 100.0 | 8.0E-05 | 4.8E-02 | 8.0E-03 | 2.5E-04 | 1.05 | 1.23 | 0.76 |
| V00FFQ39   | Block Brief 2000: chicken, when eat do you...                                                                     | 98.6  | 8.0E-05 | 1.3E-02 | 1.3E-04 | 1.7E-01 | 0.78 | 1.01 | 1.25 |
| V00SF9     | SF-12: how often felt calm and peaceful, past 4 weeks                                                             | 100.0 | 8.0E-05 | 4.0E-01 | 5.2E-05 | 6.1E-03 | 0.82 | 0.92 | 1.29 |
| V00CESD11  | CES-D: how often sleep was restless, past week                                                                    | 98.6  | 8.5E-05 | 5.3E-01 | 1.3E-04 | 1.8E-03 | 0.79 | 0.89 | 1.38 |
| V00CESD1   | CES-D: how often bothered by things that usually don't bother, past week                                          | 99.1  | 9.6E-05 | 2.9E-01 | 6.6E-05 | 1.2E-02 | 0.77 | 0.90 | 1.40 |
| V00CESD12  | CES-D: how often was happy, past week                                                                             | 99.1  | 1.2E-04 | 4.1E-02 | 9.9E-05 | 1.0E-01 | 1.21 | 1.01 | 0.81 |
| V00VITCCV  | Block Brief 2000: Vitamin C single vitamin, how often past 12 months (calc)                                       | 99.5  | 1.2E-04 | 1.0E+00 | 3.9E-04 | 2.5E-04 | 1.32 | 1.10 | 0.65 |
| V00CESD3   | CES-D: how often felt could not shake off the blues even with help from family and friends, past week             | 99.5  | 1.3E-04 | 7.8E-02 | 1.0E-04 | 4.2E-02 | 0.79 | 0.91 | 1.36 |
| V00STRTBCV | Block Brief 2000: Stress-tabs or B-Complex type multivitamins, how often past 12 months (calc)                    | 98.6  | 1.4E-04 | 1.0E+00 | 1.9E-03 | 9.1E-05 | 1.19 | 1.19 | 0.68 |
| V00FFQ8    | Block Brief 2000: bananas, eat how often, past 12 months                                                          | 100.0 | 1.4E-04 | 7.8E-02 | 6.0E-02 | 5.3E-05 | 1.03 | 1.31 | 0.72 |
| V00FFQ40   | Block Brief 2000: fried fish/fish sandwich at home or in a restaurant, eat how often, past 12 months              | 99.5  | 1.5E-04 | 1.3E-04 | 4.9E-02 | 1.0E+00 | 0.74 | 1.20 | 1.10 |
| V00CESD19  | CES-D: how often felt that people disliked me, past week                                                          | 96.3  | 1.8E-04 | 1.0E+00 | 3.8E-04 | 6.3E-03 | 0.83 | 0.86 | 1.36 |
| V00FFQ12   | Block Brief 2000: any other fruit (e.g., grapes/melon/ strawberries/peaches), eat how often, past 12 months       | 100.0 | 2.1E-04 | 1.1E-01 | 8.5E-02 | 5.2E-05 | 1.02 | 1.26 | 0.76 |
| P01RHBE    | Right hand exam: total number of bony enlargements (calc)                                                         | 99.5  | 2.1E-04 | 2.4E-02 | 4.2E-04 | 2.1E-01 | 1.43 | 0.96 | 0.70 |
| V00FFQ46   | Block Brief 2000: cheese dishes without tomato sauce (e.g., macaroni and cheese), eat how often, past 12 months   | 99.5  | 2.4E-04 | 2.3E-04 | 7.1E-02 | 8.5E-01 | 0.78 | 1.21 | 1.04 |
| V00SLNMCV  | Block Brief 2000: Selenium alone, how often past 12 months (calc)                                                 | 98.6  | 2.6E-04 | 1.0E+00 | 2.0E-03 | 2.2E-04 | 1.17 | 1.11 | 0.75 |
| V00FFQ63   | Block Brief 2000: Hawaiian Punch/Sunny Delight/Hi-C/Tang/ Ocean Spray juices, drink how often, past 12 months     | 100.0 | 3.0E-04 | 5.9E-04 | 9.8E-03 | 1.0E+00 | 0.66 | 1.20 | 1.20 |
| V00FFQ48   | Block Brief 2000: biscuits/muffins, eat how often, past 12 months                                                 | 99.5  | 3.1E-04 | 1.5E-04 | 1.0E+00 | 1.1E-01 | 0.82 | 1.23 | 0.97 |

|            |                                                                                                                                       |       |         |         |         |         |      |      |      |
|------------|---------------------------------------------------------------------------------------------------------------------------------------|-------|---------|---------|---------|---------|------|------|------|
| V00FFQ41   | Block Brief 2000: any other fish/shellfish not fried (including tuna), eat how often, past 12 months                                  | 99.5  | 3.1E-04 | 3.1E-01 | 1.2E-02 | 2.4E-04 | 1.06 | 1.20 | 0.78 |
| V00ANTOXC  | Block Brief 2000: Antioxidant combination type multivitamins, how often past 12 months (calc)                                         | 99.1  | 3.4E-04 | 1.0E+00 | 2.9E-03 | 2.9E-04 | 1.16 | 1.18 | 0.71 |
| V00VITDCV  | Block Brief 2000: Vitamin D, alone or with calcium, how often past 12 months (calc)                                                   | 99.1  | 3.4E-04 | 1.0E+00 | 1.7E-03 | 3.1E-04 | 1.21 | 1.18 | 0.67 |
| V00VITACV  | Block Brief 2000: Vitamin A (not beta-carotene) single vitamin, how often past 12 months (calc)                                       | 98.6  | 3.5E-04 | 8.9E-01 | 6.8E-03 | 3.2E-04 | 1.08 | 1.16 | 0.79 |
| V00FFQ15   | Block Brief 2000: sweet potatoes/yams/sweet potato pie, eat how often, past 12 months                                                 | 100.0 | 4.1E-04 | 4.2E-04 | 1.0E+00 | 3.2E-02 | 0.84 | 1.28 | 0.91 |
| V00CESD18  | CES-D: how often felt sad, past week                                                                                                  | 99.1  | 4.2E-04 | 1.0E+00 | 5.1E-04 | 4.2E-03 | 0.77 | 0.83 | 1.49 |
| V00FOLATCV | Block Brief 2000: Folic acid, folate single vitamin, how often past 12 months (calc)                                                  | 98.6  | 4.4E-04 | 1.0E+00 | 4.1E-03 | 3.3E-04 | 1.16 | 1.17 | 0.71 |
| V00GLCFQCV | Glucosamine frequency of use, past 6 months (calc)                                                                                    | 99.1  | 5.4E-04 | 1.0E+00 | 4.5E-04 | 8.8E-04 | 1.35 | 1.29 | 0.52 |
| P01BPBAD   | Q43b.When had back pain how bad was it on average, past 30 days                                                                       | 100.0 | 6.7E-04 | 1.2E-01 | 4.4E-04 | 1.3E-01 | 0.87 | 0.99 | 1.16 |
| V00BCARCV  | Block Brief 2000: Beta-carotene single vitamin, how often past 12 months (calc)                                                       | 98.6  | 6.8E-04 | 1.0E+00 | 5.8E-03 | 6.1E-04 | 1.10 | 1.09 | 0.83 |
| V00FFQ51   | Block Brief 2000: dark bread (e.g., rye/whole wheat, including in sandwiches), eat how often, past 12 months                          | 100.0 | 7.3E-04 | 1.8E-01 | 2.1E-02 | 1.2E-03 | 1.06 | 1.24 | 0.75 |
| V00FFQ4    | Block Brief 2000: cold cereals (e.g., Corn Flakes/Cheerios...), eat how often, past 12 months                                         | 100.0 | 7.4E-04 | 1.0E+00 | 4.5E-03 | 4.5E-04 | 1.15 | 1.21 | 0.69 |
| V00FFQSZ51 | Block Brief 2000: dark bread, how many slices each time                                                                               | 95.3  | 7.4E-04 | 1.0E+00 | 1.0E-03 | 7.1E-03 | 0.86 | 0.90 | 1.27 |
| V00VITECV  | Block Brief 2000: Vitamin E single vitamin, how often past 12 months (calc)                                                           | 98.6  | 7.9E-04 | 1.0E+00 | 2.4E-03 | 1.0E-03 | 1.23 | 1.13 | 0.70 |
| V00FFQ28   | Block Brief 2000: any other vegetable (e.g., corn/squash/okra...), eat how often, past 12 months                                      | 100.0 | 1.2E-03 | 3.5E-02 | 2.0E-01 | 2.5E-03 | 1.00 | 1.20 | 0.82 |
| V00ZINCCV  | Block Brief 2000: Zinc alone, how often past 12 months (calc)                                                                         | 98.6  | 1.4E-03 | 9.6E-01 | 1.6E-02 | 1.2E-03 | 1.13 | 1.12 | 0.78 |
| V00CALCMCV | Block Brief 2000: Calcium/Tums (alone or combined with Vitamin D or magnesium), how often past 12 months (calc)                       | 99.5  | 1.7E-03 | 1.0E+00 | 3.1E-03 | 5.2E-03 | 1.25 | 1.09 | 0.71 |
| V00CESD10  | CES-D: how often felt fearful, past week                                                                                              | 99.5  | 1.9E-03 | 8.3E-01 | 2.5E-02 | 1.9E-03 | 0.90 | 0.81 | 1.34 |
| V00PASE5   | Leisure activities: strenuous sport/recreation, past 7 days                                                                           | 100.0 | 2.3E-03 | 1.4E-01 | 5.1E-03 | 8.9E-02 | 1.31 | 0.95 | 0.79 |
| V00CESD15  | CES-D: how often felt people were unfriendly, past week                                                                               | 97.2  | 2.3E-03 | 1.0E+00 | 2.7E-03 | 2.9E-02 | 0.86 | 0.88 | 1.30 |
| V00FFQSZ8  | Block Brief 2000: bananas, how many each time                                                                                         | 89.3  | 2.5E-03 | 1.0E+00 | 2.1E-03 | 2.0E-02 | 0.93 | 0.94 | 1.14 |
| V00FFQ33   | Block Brief 2000: beef steaks/roasts/pot roast (including in frozen dinners/sandwiches), eat how often, past 12 months                | 99.1  | 2.6E-03 | 4.2E-02 | 2.7E-01 | 6.8E-03 | 0.98 | 1.22 | 0.82 |
| V00FFQ16   | Block Brief 2000: rice/dishes made with rice, eat how often, past 12 months                                                           | 100.0 | 2.6E-03 | 4.1E-02 | 3.3E-01 | 6.2E-03 | 0.99 | 1.19 | 0.84 |
| V00DRNKAMT | How many alcoholic drinks in typical week, past 12 months                                                                             | 100.0 | 2.6E-03 | 1.5E-02 | 1.4E-02 | 1.0E+00 | 1.23 | 0.90 | 0.89 |
| V00FFQ66   | Block Brief 2000: glasses of milk (any kind), drink how often, past 12 months                                                         | 100.0 | 3.3E-03 | 1.2E-01 | 2.7E-01 | 2.8E-03 | 0.99 | 1.31 | 0.75 |
| V00CESD8   | CES-D: how often felt hopeful about the future, past week                                                                             | 97.7  | 3.5E-03 | 1.0E+00 | 3.4E-03 | 2.5E-02 | 1.14 | 1.08 | 0.80 |
| V00FFQ55   | Block Brief 2000: peanuts/peanut butter, eat how often, past 12 months                                                                | 100.0 | 3.6E-03 | 2.8E-01 | 9.5E-02 | 3.2E-03 | 1.03 | 1.23 | 0.77 |
| V00CHNFQCV | Chondroitin sulfate frequency of use, past 6 months (calc)                                                                            | 99.1  | 3.7E-03 | 1.0E+00 | 3.2E-03 | 5.0E-03 | 1.30 | 1.24 | 0.58 |
| P01LHBE    | Left hand exam: total number of bony enlargements (calc)                                                                              | 99.5  | 4.2E-03 | 8.8E-02 | 7.6E-03 | 4.2E-01 | 1.42 | 0.93 | 0.73 |
| V00FFQ62   | Block Brief 2000: real orange or grapefruit juice/Welch's grape juice/Minutemaide juices/Juicy Juice, drink how often, past 12 months | 100.0 | 4.4E-03 | 7.9E-02 | 5.1E-01 | 4.6E-03 | 0.98 | 1.26 | 0.80 |
| V00FFQ3    | Block Brief 2000: cooked cereals (e.g., oatmeal/cream of wheat/grits) eat how often, past 12 months                                   | 99.5  | 5.2E-03 | 4.7E-03 | 1.0E+00 | 1.6E-01 | 0.85 | 1.26 | 0.93 |

|            |                                                                                                                                 |       |         |         |         |         |      |      |      |
|------------|---------------------------------------------------------------------------------------------------------------------------------|-------|---------|---------|---------|---------|------|------|------|
| V00FFQ10   | Block Brief 2000: oranges/tangerines (not including juice), eat how often, past 12 months                                       | 100.0 | 5.8E-03 | 4.7E-03 | 9.2E-01 | 3.2E-01 | 0.84 | 1.23 | 0.95 |
| V00FFQ54   | Block Brief 2000: butter on bread/potatoes/vegetables, eat how often, past 12 months                                            | 100.0 | 7.7E-03 | 8.8E-02 | 4.2E-01 | 1.4E-02 | 0.97 | 1.31 | 0.77 |
| P01TJE30WC | TMJ: jaw joint or in front of ear, how often worried or concerned about pain or aching, past 30 days (calc)                     | 99.1  | 7.8E-03 | 4.9E-02 | 8.0E-03 | 1.0E+00 | 0.69 | 1.06 | 1.31 |
| V00FFQSZ22 | Block Brief 2000: spinach/greens, how much each time                                                                            | 89.8  | 8.1E-03 | 1.8E-01 | 1.4E-02 | 2.5E-01 | 0.85 | 0.99 | 1.18 |
| V00FFQ56   | Block Brief 2000: snacks (e.g., potato chips/corn chips/popcorn...not pretzels), eat how often, past 12 months                  | 100.0 | 9.3E-03 | 2.5E-02 | 1.0E+00 | 4.4E-02 | 0.94 | 1.21 | 0.87 |
| V00FFQSZ10 | Block Brief 2000: oranges/tangerines, how many each time                                                                        | 86.5  | 9.5E-03 | 2.2E-01 | 5.9E-03 | 4.1E-01 | 0.89 | 0.98 | 1.14 |
| V00FFQ64   | Block Brief 2000: Kool Aid/Capri Sun/Knudsen juices, drink how often, past 12 months                                            | 100.0 | 1.0E-02 | 3.7E-02 | 2.0E-02 | 1.0E+00 | 0.68 | 1.10 | 1.28 |
| V00PASE3   | Leisure activities: light sport/recreation, past 7 days                                                                         | 100.0 | 1.2E-02 | 1.9E-01 | 3.1E-02 | 3.4E-01 | 1.19 | 0.97 | 0.86 |
| V00PA230CV | How often kneel 30 minutes or more during typical week, past 30 days (calc)                                                     | 99.5  | 1.3E-02 | 6.8E-02 | 1.0E+00 | 4.4E-02 | 0.94 | 1.28 | 0.82 |
| V00FFQ53   | Block Brief 2000: margarine on bread/potatoes/vegetables, eat how often, past 12 months                                         | 100.0 | 1.3E-02 | 9.5E-02 | 2.3E-02 | 1.0E+00 | 0.78 | 1.06 | 1.19 |
| V00FFQ27   | Block Brief 2000: salad dressing/mayonnaise (not lowfat), eat how often, past 12 months                                         | 100.0 | 1.4E-02 | 1.8E-01 | 4.6E-01 | 1.5E-02 | 1.00 | 1.19 | 0.83 |
| V00PASE6   | Leisure activities: muscle strength/endurance, past 7 days                                                                      | 100.0 | 1.6E-02 | 3.0E-01 | 1.8E-02 | 3.8E-01 | 1.25 | 1.00 | 0.78 |
| V00FFQ14   | Block Brief 2000: white potatoes not fried (including boiled/baked/mashed/ potato salad), eat how often, past 12 months         | 100.0 | 1.6E-02 | 1.0E-01 | 1.0E+00 | 2.0E-02 | 0.99 | 1.15 | 0.87 |
| V00FFQ26   | Block Brief 2000: catsup/salsa/chile peppers, eat how often, past 12 months                                                     | 100.0 | 1.7E-02 | 5.3E-02 | 1.0E+00 | 5.0E-02 | 0.94 | 1.25 | 0.84 |
| V00FFQSZ27 | Block Brief 2000: salad dressing/mayonnaise (not lowfat), how many TBSP each time                                               | 85.6  | 1.8E-02 | 1.0E+00 | 1.6E-02 | 7.6E-02 | 0.85 | 0.91 | 1.28 |
| V00FFQSZ59 | Block Brief 2000: ice cream/frozen yogurt/ice cream bars, how much each time                                                    | 94.9  | 1.8E-02 | 7.1E-02 | 5.3E-02 | 1.0E+00 | 0.86 | 1.02 | 1.13 |
| V00FFQSZ23 | Block Brief 2000: cole slaw/cabbage, how much each time                                                                         | 90.2  | 2.2E-02 | 2.1E-01 | 3.7E-02 | 5.8E-01 | 0.85 | 1.00 | 1.16 |
| V00FFQ90   | Block Brief 2000: fat or oil, how often use in cooking                                                                          | 99.1  | 2.2E-02 | 2.6E-01 | 5.9E-01 | 1.7E-02 | 1.00 | 1.17 | 0.85 |
| V00FFQ61   | Block Brief 2000: chocolate candy/candy bars, eat how often, past 12 months                                                     | 100.0 | 2.4E-02 | 1.0E+00 | 3.0E-02 | 4.5E-02 | 1.10 | 1.14 | 0.79 |
| V00FFQ49   | Block Brief 2000: rolls/hamburger buns/english muffins/bagels, eat how often, past 12 months                                    | 100.0 | 2.8E-02 | 5.4E-01 | 2.4E-01 | 2.9E-02 | 1.02 | 1.15 | 0.85 |
| V00FALLCV  | How many times fallen, past 12 months (calc)                                                                                    | 98.6  | 2.8E-02 | 2.9E-02 | 2.7E-01 | 1.0E+00 | 0.78 | 1.09 | 1.15 |
| V00FFQSZ62 | Block Brief 2000: real orange or grapefruit juice/Welch's grape juice/Minutemaid juices/Juicy Juice, how many glasses each time | 93.0  | 3.1E-02 | 7.4E-01 | 2.7E-02 | 2.8E-01 | 0.84 | 0.92 | 1.27 |
| V00FFQ60   | Block Brief 2000: ice cream/frozen yogurt, when eat is it...                                                                    | 95.3  | 3.4E-02 | 1.0E+00 | 7.1E-02 | 4.2E-02 | 0.94 | 0.89 | 1.18 |
| V00FFQ58   | Block Brief 2000: cookies (not lowfat), eat how often, past 12 months                                                           | 100.0 | 3.9E-02 | 1.0E+00 | 3.4E-02 | 1.1E-01 | 1.11 | 1.09 | 0.82 |
| V00PA430CV | How often lift or move objects weighing 25 pounds or more by hand during a typical week, past 30 days (calc)                    | 99.5  | 4.6E-02 | 5.9E-01 | 4.6E-02 | 4.8E-01 | 1.19 | 1.00 | 0.83 |
| V00FFQSZ9  | Block Brief 2000: apples/pears, how many each time                                                                              | 92.1  | 4.9E-02 | 4.1E-01 | 5.1E-02 | 6.9E-01 | 0.92 | 0.99 | 1.09 |
| V00FFQ52   | Block Brief 2000: tortillas, eat how often, past 12 months                                                                      | 100.0 | 5.1E-02 | 1.0E+00 | 5.5E-02 | 9.6E-02 | 1.04 | 1.23 | 0.76 |
| V00IRONCV  | Block Brief 2000: Iron alone, how often past 12 months (calc)                                                                   | 99.1  | 5.2E-02 | 1.0E+00 | 1.1E-01 | 6.7E-02 | 1.12 | 1.01 | 0.88 |
| V00PASE4   | Leisure activities: moderate sport/recreation, past 7 days                                                                      | 100.0 | 5.2E-02 | 1.0E+00 | 4.2E-02 | 8.9E-02 | 1.11 | 1.07 | 0.84 |
| V00FFQ69   | Block Brief 2000: regular soft drinks/bottled drinks like Snapple (not diet drinks), drink how often, past 12 months            | 100.0 | 5.6E-02 | 1.0E+00 | 5.8E-02 | 1.6E-01 | 0.83 | 0.90 | 1.31 |
| V00FFQSZ58 | Block Brief 2000: cookies (not lowfat), how many each time                                                                      | 91.6  | 5.7E-02 | 2.8E-01 | 1.1E-01 | 8.6E-01 | 0.90 | 0.98 | 1.13 |

|            |                                                                                                                                       |       |         |         |         |         |      |      |      |
|------------|---------------------------------------------------------------------------------------------------------------------------------------|-------|---------|---------|---------|---------|------|------|------|
| V00FFQ45   | Block Brief 2000: spaghetti/lasagna/other pasta with tomato sauce, eat how often, past 12 months                                      | 100.0 | 5.7E-02 | 2.5E-01 | 9.2E-01 | 9.1E-02 | 0.99 | 1.12 | 0.90 |
| V00FFQ57   | Block Brief 2000: doughnuts/cake/pastry/pie, eat how often, past 12 months                                                            | 100.0 | 5.9E-02 | 8.8E-02 | 1.0E+00 | 2.3E-01 | 0.92 | 1.15 | 0.94 |
| V00FFQSZ4  | Block Brief 2000: cold cereals, which bowl each time                                                                                  | 86.0  | 6.4E-02 | 6.6E-02 | 7.3E-01 | 1.0E+00 | 0.90 | 1.08 | 1.02 |
| V00FFQ72   | Block Brief 2000: liquor/mixed drinks, drink how often, past 12 months                                                                | 100.0 | 6.8E-02 | 9.6E-01 | 7.5E-02 | 3.3E-01 | 1.33 | 0.98 | 0.75 |
| V00FFQSZ25 | Block Brief 2000: raw tomatoes, how much each time                                                                                    | 92.6  | 7.1E-02 | 1.0E+00 | 8.6E-02 | 1.3E-01 | 0.91 | 0.92 | 1.19 |
| V00PA130NM | How many flights of stairs have you climbed up, past 7 days (one flight equals 10 steps)                                              | 99.1  | 7.3E-02 | 1.0E+00 | 5.9E-02 | 4.2E-01 | 1.12 | 1.04 | 0.86 |
| V00FFQSZ43 | Block Brief 2000: boloney/sliced ham/turkey lunch meat/other lunch meat, how many slices each time                                    | 87.9  | 8.1E-02 | 1.0E+00 | 8.1E-02 | 2.6E-01 | 0.92 | 0.95 | 1.14 |
| V00LIVENO  | Besides self, how many other people live in household (calc)                                                                          | 100.0 | 8.4E-02 | 1.0E+00 | 9.0E-02 | 1.8E-01 | 1.04 | 1.18 | 0.80 |
| V00FFQSZ66 | Block Brief 2000: milk (any kind), how many glasses each time                                                                         | 84.7  | 9.1E-02 | 1.0E+00 | 1.0E-01 | 2.4E-01 | 0.88 | 0.91 | 1.23 |
| V00FFQSZ49 | Block Brief 2000: rolls/hamburger buns/english muffins/bagels, how many each time                                                     | 95.8  | 9.6E-02 | 1.0E+00 | 7.7E-02 | 3.0E-01 | 0.94 | 0.96 | 1.10 |
| V00FFQ32   | Block Brief 2000: tacos/burritos/enchiladas/tamales, eat how often, past 12 months                                                    | 99.1  | 1.0E-01 | 3.5E-01 | 1.0E+00 | 1.7E-01 | 0.91 | 1.25 | 0.86 |
| V00FFQSZ19 | Block Brief 2000: green beans/green peas, how much each time                                                                          | 95.3  | 1.1E-01 | 1.1E-01 | 7.9E-01 | 1.0E+00 | 0.91 | 1.06 | 1.03 |
| V00FFQ42   | Block Brief 2000: hot dogs/sausage (e.g., Polish/Italian/Chorizo), eat how often, past 12 months                                      | 99.5  | 1.1E-01 | 2.2E-01 | 2.7E-01 | 1.0E+00 | 0.86 | 1.06 | 1.09 |
| V00FFQSZ1  | Block Brief 2000: eggs (not egg substitutes), how many each time                                                                      | 96.7  | 1.2E-01 | 1.0E+00 | 1.1E-01 | 4.6E-01 | 0.93 | 0.97 | 1.11 |
| V00FFQ31   | Block Brief 2000: hamburgers/cheeseburgers/meat loaf (at home or in restaurant), eat how often, past 12 months                        | 99.5  | 1.2E-01 | 1.3E-01 | 1.0E+00 | 6.0E-01 | 0.92 | 1.11 | 0.98 |
| V00FFQSZ57 | Block Brief 2000: doughnuts/cake/pastry/pie, how many pieces each time                                                                | 95.3  | 1.2E-01 | 1.0E+00 | 1.2E-01 | 4.1E-01 | 0.88 | 0.96 | 1.18 |
| V00FFQSZ6  | Block Brief 2000: cheese, how many slices each time                                                                                   | 95.3  | 1.3E-01 | 8.4E-01 | 1.2E-01 | 8.8E-01 | 0.89 | 0.99 | 1.13 |
| V00PA130CV | How often climb up total of 10 or more flights of stairs during typical week, past 30 days (calc)                                     | 100.0 | 1.3E-01 | 4.6E-01 | 1.0E+00 | 1.9E-01 | 0.98 | 1.22 | 0.83 |
| V00FFQSZ55 | Block Brief 2000: peanuts/peanut butter, how many TBSP each time                                                                      | 95.8  | 1.4E-01 | 8.5E-01 | 7.7E-01 | 1.6E-01 | 1.01 | 1.12 | 0.88 |
| V00FFQSZ16 | Block Brief 2000: rice/dishes made with rice, how much each time                                                                      | 94.9  | 1.5E-01 | 1.0E+00 | 5.8E-01 | 1.7E-01 | 1.02 | 1.10 | 0.89 |
| V00FFQ59   | Block Brief 2000: ice cream/frozen yogurt/ice cream bars, eat how often, past 12 months                                               | 100.0 | 1.5E-01 | 4.7E-01 | 1.0E+00 | 2.2E-01 | 0.98 | 1.12 | 0.91 |
| V00FFQSZ11 | Block Brief 2000: applesauce/fruit cocktail/any canned fruit, how much each time                                                      | 86.0  | 1.5E-01 | 1.9E-01 | 6.2E-01 | 1.0E+00 | 0.89 | 1.07 | 1.04 |
| V00FFQ36   | Block Brief 2000: mixed dishes with meat or chicken (e.g., stew/corned beef hash...or in frozen meals), eat how often, past 12 months | 99.5  | 1.7E-01 | 5.7E-01 | 1.0E+00 | 2.6E-01 | 0.98 | 1.13 | 0.90 |
| V00FFQ6    | Block Brief 2000: cheese/sliced cheese/cheese spread (including on sandwiches), eat how often, past 12 months                         | 100.0 | 1.8E-01 | 1.0E+00 | 5.5E-01 | 2.1E-01 | 1.04 | 1.10 | 0.88 |
| V00FFQSZ17 | Block Brief 2000: baked beans/chili with beans/pintos/any other dried beans, how much each time                                       | 93.0  | 1.9E-01 | 2.1E-01 | 1.0E+00 | 9.2E-01 | 0.92 | 1.08 | 1.00 |
| V00FFQSZ61 | Block Brief 2000: chocolate candy/candy bars, how many bars each time                                                                 | 93.0  | 2.0E-01 | 4.2E-01 | 4.2E-01 | 1.0E+00 | 0.88 | 1.00 | 1.13 |
| V00FFQSZ12 | Block Brief 2000: any other fruit, how much each time                                                                                 | 94.4  | 2.1E-01 | 2.1E-01 | 1.0E+00 | 1.0E+00 | 0.94 | 1.07 | 1.00 |
| V00FFQSZ28 | Block Brief 2000: any other vegetable, how much each time                                                                             | 97.7  | 2.2E-01 | 1.0E+00 | 3.0E-01 | 7.2E-01 | 0.92 | 0.98 | 1.11 |
| V00FFQ34   | Block Brief 2000: pork (including chops/roasts)/dinner ham, eat how much, past 12 months                                              | 99.1  | 2.2E-01 | 5.6E-01 | 1.0E+00 | 3.2E-01 | 0.97 | 1.12 | 0.92 |

|            |                                                                                                                  |       |         |         |         |         |      |      |      |
|------------|------------------------------------------------------------------------------------------------------------------|-------|---------|---------|---------|---------|------|------|------|
| P01BP30OFT | Q43a.How often bothered by back pain, past 30 days                                                               | 100.0 | 2.3E-01 | 4.2E-01 | 5.0E-01 | 1.0E+00 | 0.94 | 1.02 | 1.04 |
| V00FFQSZ48 | Block Brief 2000: biscuits/muffins, how many each time                                                           | 91.2  | 2.3E-01 | 1.0E+00 | 2.8E-01 | 9.5E-01 | 0.89 | 0.97 | 1.16 |
| V00FFQ1    | Block Brief 2000: eggs (include egg biscuits/Egg McMuffins (not egg substitutes)), eat how often, past 12 months | 100.0 | 2.4E-01 | 2.9E-01 | 9.6E-01 | 1.0E+00 | 0.92 | 1.05 | 1.03 |
| V00FFQSZ42 | Block Brief 2000: hot dogs/sausage, how many each time                                                           | 88.8  | 2.4E-01 | 1.0E+00 | 2.5E-01 | 8.5E-01 | 0.91 | 0.99 | 1.11 |
| V00PA330CV | How often squat for 30 minutes or more during typical week, past 30 days (calc)                                  | 99.5  | 2.4E-01 | 3.6E-01 | 1.0E+00 | 8.3E-01 | 0.89 | 1.20 | 0.93 |
| V00FFQ43   | Block Brief 2000: boloney (bologna)/sliced ham/turkey lunch meat/other lunch meat, eat how often, past 12 months | 99.5  | 2.5E-01 | 2.6E-01 | 1.0E+00 | 1.0E+00 | 0.91 | 1.08 | 1.02 |
| V00FFQ44   | Block Brief 2000: lunch meats, when eat are they...                                                              | 88.4  | 2.7E-01 | 1.0E+00 | 4.3E-01 | 4.0E-01 | 0.95 | 0.94 | 1.13 |
| V00FFQ13   | Block Brief 2000: french fries/fried potatoes/hash browns, eat how often, past 12 months                         | 100.0 | 2.9E-01 | 5.3E-01 | 6.3E-01 | 1.0E+00 | 0.90 | 1.05 | 1.05 |
| V00FFQSZ14 | Block Brief 2000: white potatoes not fried, how much each time                                                   | 96.7  | 2.9E-01 | 5.6E-01 | 6.1E-01 | 1.0E+00 | 0.93 | 1.02 | 1.05 |
| V00FFQ18   | Block Brief 2000: refried beans, eat how often, past 12 months                                                   | 100.0 | 2.9E-01 | 1.0E+00 | 6.2E-01 | 3.9E-01 | 1.01 | 1.15 | 0.85 |
| V00FFQSZ20 | Block Brief 2000: broccoli, how much each time                                                                   | 91.2  | 3.2E-01 | 3.7E-01 | 1.0E+00 | 1.0E+00 | 0.94 | 1.05 | 1.01 |
| V00FFQSZ33 | Block Brief 2000: beef steaks/roasts/pot roast, how much each time                                               | 88.4  | 3.2E-01 | 7.9E-01 | 5.6E-01 | 1.0E+00 | 0.93 | 1.00 | 1.07 |
| V00FFQSZ31 | Block Brief 2000: meat (hamburgers...), how much each time                                                       | 91.6  | 3.4E-01 | 1.0E+00 | 6.2E-01 | 4.6E-01 | 0.97 | 0.94 | 1.10 |
| V00FFQ70   | Block Brief 2000: beer, drink how often, past 12 months                                                          | 100.0 | 3.5E-01 | 6.0E-01 | 8.4E-01 | 1.0E+00 | 1.17 | 0.90 | 0.94 |
| V00PASE1   | Leisure activities: sitting, past 7 days                                                                         | 100.0 | 3.6E-01 | 1.0E+00 | 1.0E+00 | 5.2E-01 | 1.00 | 0.96 | 1.04 |
| V00FFQSZ45 | Block Brief 2000: spaghetti/lasagna/other pasta with tomato sauce, how much each time                            | 95.8  | 3.7E-01 | 5.2E-01 | 1.0E+00 | 1.0E+00 | 0.95 | 1.05 | 1.01 |
| V00FFQ50   | Block Brief 2000: white bread/toast (including French/Italian or in sandwiches), eat how often, past 12 months   | 100.0 | 3.8E-01 | 1.0E+00 | 9.4E-01 | 5.1E-01 | 0.97 | 0.90 | 1.13 |
| V00FFQSZ24 | Block Brief 2000: green salad, how much each time                                                                | 94.0  | 3.9E-01 | 5.1E-01 | 1.0E+00 | 1.0E+00 | 0.96 | 1.05 | 0.99 |
| P01TJF30WC | TMJ: across face or cheek, how often worried or concerned about pain or aching, past 30 days (calc)              | 100.0 | 3.9E-01 | 1.0E+00 | 7.0E-01 | 7.0E-01 | 0.92 | 0.92 | 1.16 |
| V00FFQSZ26 | Block Brief 2000: catsup/salsa/chile peppers, how many TBSP each time                                            | 84.7  | 4.0E-01 | 1.0E+00 | 5.9E-01 | 6.9E-01 | 0.92 | 0.93 | 1.16 |
| V00FFQSZ56 | Block Brief 2000: snacks (not pretzels), how much each time                                                      | 95.3  | 4.4E-01 | 1.0E+00 | 1.0E+00 | 6.2E-01 | 1.02 | 1.05 | 0.93 |
| V00PA530CV | How often get in and out of squatting position 10 or more times during a typical week, past 30 days (calc)       | 100.0 | 4.5E-01 | 1.0E+00 | 6.8E-01 | 1.0E+00 | 1.11 | 0.99 | 0.91 |
| V00FFQSZ41 | Block Brief 2000: any other fish/shellfish not fried, how much each time                                         | 94.4  | 4.7E-01 | 6.2E-01 | 1.0E+00 | 1.0E+00 | 0.97 | 1.04 | 0.99 |
| V00FFQSZ38 | Block Brief 2000: chicken/turkey not fried, how much each time                                                   | 97.2  | 5.2E-01 | 1.0E+00 | 8.1E-01 | 1.0E+00 | 0.97 | 1.01 | 1.03 |
| V00FFQSZ47 | Block Brief 2000: pizza, how many slices each time                                                               | 90.7  | 5.3E-01 | 7.8E-01 | 1.0E+00 | 1.0E+00 | 1.06 | 0.95 | 0.99 |
| V00FFQSZ13 | Block Brief 2000: french fries/fried potatoes/hash browns, how much each time                                    | 89.8  | 5.4E-01 | 1.0E+00 | 8.3E-01 | 1.0E+00 | 0.95 | 0.99 | 1.07 |
| V00PASE2HR | Leisure activities: walking, hours per day, past 7 days                                                          | 82.8  | 5.4E-01 | 1.0E+00 | 1.0E+00 | 1.0E+00 | 0.95 | 1.07 | 0.98 |
| V00FFQSZ34 | Block Brief 2000: pork/dinner ham, how much each time                                                            | 86.5  | 5.5E-01 | 1.0E+00 | 8.0E-01 | 1.0E+00 | 0.96 | 0.99 | 1.05 |
| V00PASE1HR | Leisure activities: sitting, hours per day, past 7 days                                                          | 100.0 | 5.9E-01 | 1.0E+00 | 9.7E-01 | 1.0E+00 | 0.97 | 1.01 | 1.01 |
| V00FFQSZ21 | Block Brief 2000: carrots/stews or mixed vegetables containing carrots, how much each time                       | 95.3  | 5.9E-01 | 9.9E-01 | 1.0E+00 | 1.0E+00 | 0.95 | 1.04 | 1.01 |
| V00PASE2   | Leisure activities: walking, past 7 days                                                                         | 100.0 | 6.6E-01 | 1.0E+00 | 1.0E+00 | 1.0E+00 | 1.04 | 1.02 | 0.94 |
| V00FFQSZ36 | Block Brief 2000: mixed dishes with meat or chicken, how much each time                                          | 92.1  | 7.1E-01 | 1.0E+00 | 1.0E+00 | 1.0E+00 | 0.97 | 1.03 | 1.00 |

|            |                                                                                                                     |       |         |         |         |         |      |      |      |
|------------|---------------------------------------------------------------------------------------------------------------------|-------|---------|---------|---------|---------|------|------|------|
| V00FFQ35   | Block Brief 2000: beef/pork, when eat do you...                                                                     | 96.3  | 7.2E-01 | 1.0E+00 | 1.0E+00 | 1.0E+00 | 1.01 | 0.94 | 1.05 |
| V00FFQ65   | Block Brief 2000: instant breakfast milkshakes, diet shakes, or liquid supplements, drink how often, past 12 months | 99.5  | 8.1E-01 | 1.0E+00 | 1.0E+00 | 1.0E+00 | 0.99 | 0.94 | 1.07 |
| V00FFQ47   | Block Brief 2000: pizza (including carry-out), eat how often, past 12 months                                        | 100.0 | 8.4E-01 | 1.0E+00 | 1.0E+00 | 1.0E+00 | 0.98 | 1.06 | 0.97 |
| V00FFQSZ29 | Block Brief 2000: vegetable soups, which bowl each time                                                             | 92.6  | 8.5E-01 | 1.0E+00 | 1.0E+00 | 1.0E+00 | 0.97 | 1.02 | 1.01 |
| P01RATOTCV | Q9.RA symptoms: total score for questions #2 through #8 (calc)                                                      | 100.0 | 8.7E-01 | 1.0E+00 | 1.0E+00 | 1.0E+00 | 0.96 | 0.99 | 1.05 |
| V00FFQSZ15 | Block Brief 2000: sweet potatoes/yams/sweet potato pie, how much each time                                          | 88.4  | 9.0E-01 | 1.0E+00 | 1.0E+00 | 1.0E+00 | 0.98 | 1.00 | 1.02 |
| V00FFQSZ2  | Block Brief 2000: bacon/breakfast sausage, how many pieces each time                                                | 87.0  | 9.5E-01 | 1.0E+00 | 1.0E+00 | 1.0E+00 | 0.97 | 0.99 | 1.03 |
