# Supplementary material for: Socioeconomic status, mental health, and nutrition are the principal traits for low back pain phenotyping: Data from the osteoarthritis initiative
Source: PubMed Central journal article supplement — JOR Spine. 2023 Feb 14;6(2):e1248. doi: 10.1002/jsp2.1248 (PMC10285761; doi:10.1002/jsp2.1248), 2023-02-14
Supplement: JSP2-6-e1248-s003.pdf [file JSP2-6-e1248-s003.pdf]

**Supplementary Table 1. Statistical comparisons to determine differences between clusters: numerical variables**

Variables in gray met significance and fold change criteria. Comparisons were performed with Kruskal Wallis test. Post-hoc comparisons were performed with the Wilcoxon Rank Sum test. P values displayed here have not been adjusted.

| Variable   | Description                                                                                   | % Complete | <i>P</i> value | <i>P</i> <sub>1</sub><br>C1 vs. C2 | <i>P</i> <sub>2</sub><br>C1 vs. C3 | <i>P</i> <sub>3</sub><br>C2 vs. C3 | <i>Fold Change</i><br>C1 vs. C2/C3 | <i>Fold Change</i><br>C2 vs. C1/C3 | <i>Fold Change</i><br>C3 vs. C1/C2 |
|------------|-----------------------------------------------------------------------------------------------|------------|----------------|------------------------------------|------------------------------------|------------------------------------|------------------------------------|------------------------------------|------------------------------------|
| V00CESD    | CES-D: Center for Epidemiologic Studies Depression Scale (CES-D) Score (calc)                 | 99.1       | 3.3E-12        | 1.7E-02                            | 1.8E-11                            | 9.5E-08                            | 0.47                               | 0.69                               | 2.48                               |
| P01BPBEDCV | How many days stay in bed due to back pain, past 30 days (calc)                               | 99.5       | 6.2E-10        | 7.8E-03                            | 3.4E-10                            | 1.9E-04                            | 0.25                               | 0.66                               | 3.54                               |
| V00FIBVGFR | Block Brief 2000: daily dietary fiber from vegetables and fruits (g) (calc)                   | 100.0      | 1.2E-09        | 4.0E-06                            | 1.5E-02                            | 9.1E-08                            | 0.91                               | 1.62                               | 0.63                               |
| V00DTDFIB  | Block Brief 2000: daily nutrients from food, total dietary fiber (g) (calc)                   | 100.0      | 1.8E-09        | 1.4E-07                            | 1.3E-01                            | 2.3E-06                            | 0.86                               | 1.52                               | 0.73                               |
| V00SRVVEG  | Block Brief 2000: daily servings of vegetables (calc)                                         | 100.0      | 2.9E-08        | 8.4E-05                            | 6.8E-03                            | 8.6E-07                            | 0.99                               | 1.52                               | 0.62                               |
| V00DTVITK  | Block Brief 2000: daily nutrients from food, vitamin K (ug) (calc)                            | 100.0      | 4.2E-08        | 1.2E-05                            | 1.9E-01                            | 1.2E-06                            | 0.89                               | 1.71                               | 0.60                               |
| V00SRVFRT  | Block Brief 2000: daily servings of fruits and fruit juices (calc)                            | 100.0      | 6.4E-08        | 2.2E-03                            | 1.9E-03                            | 1.7E-07                            | 1.01                               | 1.71                               | 0.51                               |
| V00DTLUT   | Block Brief 2000: daily nutrients from food, lutein (carotenoid) (ug) (calc)                  | 100.0      | 4.8E-07        | 8.3E-06                            | 1.0E+00                            | 4.2E-05                            | 0.82                               | 1.75                               | 0.64                               |
| V00SUPVITC | Block Brief 2000: average daily nutrients supplements, vitamin C (mg) (calc)                  | 100.0      | 1.1E-06        | 1.0E+00                            | 4.3E-06                            | 4.7E-06                            | 2.25                               | 1.45                               | 0.11                               |
| V00FIBBEAN | Block Brief 2000: daily dietary fiber from beans (g) (calc)                                   | 100.0      | 1.4E-06        | 1.0E-04                            | 1.7E-01                            | 3.6E-05                            | 0.89                               | 1.74                               | 0.59                               |
| V00SUPBCAR | Block Brief 2000: average daily nutrients from vitamin supplements, beta-carotene (ug) (calc) | 100.0      | 1.6E-06        | 1.0E+00                            | 1.1E-05                            | 2.5E-06                            | 2.69                               | 1.12                               | 0.14                               |
| V00SUPFOL  | Block Brief 2000: average daily nutrients from vitamin supplements, folate (mcg) (calc)       | 100.0      | 1.7E-06        | 1.0E+00                            | 1.0E-05                            | 4.0E-06                            | 1.44                               | 1.70                               | 0.28                               |
| V00SUPSE   | Block Brief 2000: average daily nutrients from vitamin supplements, selenium (mcg) (calc)     | 100.0      | 1.8E-06        | 1.0E+00                            | 9.4E-06                            | 4.1E-06                            | 1.96                               | 1.53                               | 0.15                               |
| V00SUPVITE | Block Brief 2000: average daily nutrients from vitamin supplements, vitamin E (a-TE) (calc)   | 100.0      | 4.5E-06        | 1.0E+00                            | 1.6E-05                            | 1.4E-05                            | 1.99                               | 1.32                               | 0.23                               |
| V00SUPVITA | Block Brief 2000: average daily nutrients from vitamin supplements, vitamin A (IU) (calc)     | 100.0      | 5.7E-06        | 1.0E+00                            | 1.2E-04                            | 4.9E-06                            | 1.39                               | 1.67                               | 0.31                               |
| V00SUPVITD | Block Brief 2000: average daily nutrients from vitamin supplements, vitamin D (IU) (calc)     | 100.0      | 2.3E-05        | 1.0E+00                            | 1.9E-04                            | 1.9E-05                            | 1.39                               | 1.53                               | 0.37                               |
| V00SUPB1   | Block Brief 2000: average daily nutrients from vitamin supplements, B1 (mg) (calc)            | 100.0      | 2.5E-05        | 1.0E+00                            | 2.0E-04                            | 2.6E-05                            | 1.48                               | 1.86                               | 0.21                               |
| V00SUPB2   | Block Brief 2000: average daily nutrients from vitamin supplements, B2 (mg) (calc)            | 100.0      | 2.5E-05        | 1.0E+00                            | 2.0E-04                            | 2.6E-05                            | 1.47                               | 1.84                               | 0.22                               |
| V00SUPNIAC | Block Brief 2000: average daily nutrients from vitamin supplements, niacin (mg) (calc)        | 100.0      | 2.5E-05        | 1.0E+00                            | 2.0E-04                            | 2.6E-05                            | 1.46                               | 1.82                               | 0.23                               |
| V00SUPB6   | Block Brief 2000: average daily nutrients from vitamin supplements, B6 (mg) (calc)            | 100.0      | 3.4E-05        | 1.0E+00                            | 2.6E-04                            | 3.5E-05                            | 1.42                               | 1.73                               | 0.27                               |
| V00SUPB12  | Block Brief 2000: average daily nutrients from vitamin supplements, B12 (ug) (calc)           | 100.0      | 4.3E-05        | 1.0E+00                            | 3.4E-04                            | 4.3E-05                            | 1.42                               | 1.71                               | 0.28                               |
| V00SUPZINC | Block Brief 2000: average daily nutrients from vitamin supplements, zinc (mg) (calc)          | 100.0      | 6.6E-05        | 1.0E+00                            | 6.2E-04                            | 5.6E-05                            | 1.35                               | 1.59                               | 0.37                               |
| V00SUPMG   | Block Brief 2000: average daily nutrients from vitamin supplements, magnesium (mg) (calc)     | 100.0      | 8.2E-05        | 1.0E+00                            | 5.8E-04                            | 8.8E-05                            | 1.35                               | 1.57                               | 0.37                               |

|            |                                                                                              |       |         |         |         |         |      |      |      |
|------------|----------------------------------------------------------------------------------------------|-------|---------|---------|---------|---------|------|------|------|
| V00SUPCU   | Block Brief 2000: average daily nutrients from vitamin supplements, copper (mg) (calc)       | 100.0 | 8.2E-05 | 1.0E+00 | 5.8E-04 | 8.8E-05 | 1.35 | 1.57 | 0.37 |
| V00DTSF    | Block Brief 2000: grams of solid food (g), per week (calc)                                   | 100.0 | 1.4E-09 | 4.1E-09 | 1.0E+00 | 3.9E-05 | 0.82 | 1.48 | 0.79 |
| V00HSMSS   | SF-12: mental summary scale for the MOS 12-item short-form health survey (SF-12) v2 (calc)   | 97.2  | 4.4E-09 | 4.8E-02 | 1.0E-08 | 1.1E-05 | 1.19 | 1.08 | 0.77 |
| V00DTB6    | Block Brief 2000: daily nutrients from food, vitamin B6 (mg) (calc)                          | 100.0 | 9.5E-09 | 9.6E-07 | 2.3E-01 | 2.3E-06 | 0.89 | 1.49 | 0.72 |
| V00HSPSS   | SF-12: physical summary scale for the MOS 12-item short-form health survey (SF-12) v2 (calc) | 97.2  | 1.1E-08 | 1.6E-03 | 2.8E-08 | 2.4E-03 | 1.29 | 1.00 | 0.76 |
| V00DTFOL   | Block Brief 2000: daily nutrients from food, folate (mcg) (calc)                             | 100.0 | 6.3E-08 | 2.5E-06 | 4.1E-01 | 1.1E-05 | 0.88 | 1.47 | 0.75 |
| V00DTPOTA  | Block Brief 2000: daily nutrients from food, potassium (mg) (calc)                           | 100.0 | 7.1E-08 | 1.1E-06 | 4.6E-01 | 3.8E-05 | 0.87 | 1.44 | 0.77 |
| V00DTAIU   | Block Brief 2000: daily nutrients from food, vitamin A (IU) (calc)                           | 100.0 | 1.4E-07 | 1.7E-04 | 2.1E-02 | 2.0E-06 | 0.96 | 1.44 | 0.69 |
| V00DTARE   | Block Brief 2000: daily nutrients from food, vitamin A (RE) (calc)                           | 100.0 | 1.6E-07 | 2.8E-04 | 1.7E-02 | 1.5E-06 | 0.96 | 1.43 | 0.70 |
| V00DTMG    | Block Brief 2000: daily nutrients from food, magnesium (mg) (calc)                           | 100.0 | 1.7E-07 | 1.4E-06 | 6.9E-01 | 1.0E-04 | 0.85 | 1.46 | 0.78 |
| V00DTBCAR  | Block Brief 2000: daily nutrients from food, beta-carotene (ug) (calc)                       | 100.0 | 2.4E-07 | 3.3E-05 | 9.3E-02 | 1.2E-05 | 0.90 | 1.47 | 0.72 |
| V00DTPROA  | Block Brief 2000: daily nutrients from food, carotene, provitamin A carotenoids (ug) (calc)  | 100.0 | 3.0E-07 | 2.6E-04 | 3.9E-02 | 2.6E-06 | 0.95 | 1.46 | 0.69 |
| V00TIMET2  | Q2.20-meter walk: trial 2 time to complete (sec.hundredths/sec)                              | 96.3  | 4.3E-07 | 3.1E-02 | 8.7E-07 | 7.3E-04 | 0.85 | 0.96 | 1.21 |
| V00DTVITE  | Block Brief 2000: daily nutrients from food, vitamin E a-TE (calc)                           | 100.0 | 7.7E-07 | 1.0E-04 | 1.2E-01 | 1.8E-05 | 0.94 | 1.44 | 0.71 |
| V0020MPACE | 20-meter walk: pace (m/sec) (calc)                                                           | 97.7  | 8.0E-07 | 2.9E-02 | 1.1E-06 | 2.1E-03 | 1.16 | 1.01 | 0.85 |
| V00TIMET1  | Q1.20-meter walk: trial 1 time to complete (sec.hundredths/sec)                              | 97.7  | 8.5E-07 | 2.4E-02 | 1.2E-06 | 2.6E-03 | 0.84 | 1.02 | 1.15 |
| V00DTVITC  | Block Brief 2000: daily nutrients from food, vitamin C (mg) (calc)                           | 100.0 | 1.7E-06 | 5.2E-05 | 3.5E-01 | 7.3E-05 | 0.86 | 1.49 | 0.75 |
| V00CSTIME1 | Repeated chair stands: trial 1 time (sec.hundredths/sec)                                     | 87.4  | 3.4E-06 | 3.2E-04 | 7.6E-05 | 2.8E-01 | 0.73 | 1.02 | 1.32 |
| V00DTMETH  | Block Brief 2000: daily nutrients from food, methionine (mg) (calc)                          | 100.0 | 5.2E-06 | 2.9E-06 | 1.0E+00 | 1.5E-02 | 0.76 | 1.42 | 0.90 |
| V00DTB1    | Block Brief 2000: daily nutrients from food, thiamin (B1) (mg) (calc)                        | 100.0 | 5.4E-06 | 1.5E-05 | 1.0E+00 | 1.0E-03 | 0.84 | 1.37 | 0.85 |
| V00DTCARB  | Block Brief 2000: daily nutrients from food, carbohydrate (g) (calc)                         | 100.0 | 5.4E-06 | 3.2E-06 | 1.0E+00 | 1.1E-02 | 0.77 | 1.31 | 0.97 |
| V00DTRIBO  | Block Brief 2000: daily nutrients from food, riboflavin (B2) (mg) (calc)                     | 100.0 | 6.7E-06 | 3.7E-05 | 1.0E+00 | 5.4E-04 | 0.89 | 1.39 | 0.79 |
| V00DTACAR  | Block Brief 2000: daily nutrients from food, alpha-carotene (ug) (calc)                      | 100.0 | 7.2E-06 | 1.6E-01 | 9.2E-04 | 7.9E-06 | 1.17 | 1.44 | 0.54 |
| V00DTNIAC  | Block Brief 2000: daily nutrients from food, niacin (mg) (calc)                              | 100.0 | 7.8E-06 | 2.2E-05 | 1.0E+00 | 1.4E-03 | 0.82 | 1.44 | 0.82 |
| V00DTPROT  | Block Brief 2000: daily nutrients from food, protein (g) (calc)                              | 100.0 | 7.8E-06 | 6.7E-06 | 1.0E+00 | 6.7E-03 | 0.79 | 1.43 | 0.86 |
| V00DTCYST  | Block Brief 2000: daily nutrients from food, cysteine (mg) (calc)                            | 100.0 | 8.0E-06 | 4.7E-06 | 1.0E+00 | 1.2E-02 | 0.76 | 1.40 | 0.91 |
| V00CSPACE  | Repeated chair stand: pace in stands/sec (calc)                                              | 87.4  | 8.1E-06 | 7.3E-04 | 9.9E-05 | 3.2E-01 | 1.33 | 0.94 | 0.78 |
| V00DTKCAL  | Block Brief 2000: daily nutrients from food, calories (Kcal) (calc)                          | 100.0 | 1.1E-05 | 4.6E-06 | 1.0E+00 | 3.7E-02 | 0.76 | 1.31 | 0.98 |
| V00CSTIME2 | Repeated chair stands: trial 2 time (sec.hundredths/sec)                                     | 83.3  | 1.2E-05 | 3.1E-04 | 3.1E-04 | 1.0E+00 | 0.76 | 1.11 | 1.17 |
| V00DTZINC  | Block Brief 2000: daily nutrients from food, zinc (mg) (calc)                                | 100.0 | 1.2E-05 | 3.5E-05 | 1.0E+00 | 1.4E-03 | 0.86 | 1.43 | 0.78 |

|            |                                                                                         |       |         |         |         |         |      |      |       |
|------------|-----------------------------------------------------------------------------------------|-------|---------|---------|---------|---------|------|------|-------|
| V00DTFE    | Block Brief 2000: daily nutrients from food, iron (mg) (calc)                           | 100.0 | 1.2E-05 | 9.9E-05 | 1.0E+00 | 4.9E-04 | 0.89 | 1.40 | 0.78  |
| V00DTPHOS  | Block Brief 2000: daily nutrients from food, phosphorus (mg) (calc)                     | 100.0 | 1.6E-05 | 3.3E-05 | 1.0E+00 | 2.4E-03 | 0.83 | 1.39 | 0.84  |
| V00DTCHOL  | Block Brief 2000: daily nutrients from food, cholesterol (mg) (calc)                    | 100.0 | 1.9E-05 | 2.4E-05 | 1.3E-02 | 1.0E+00 | 0.67 | 1.29 | 1.11  |
| V00SRVMEAT | Block Brief 2000: daily servings of meat, fish, poultry, beans and eggs (calc)          | 100.0 | 2.5E-05 | 1.2E-05 | 1.9E-01 | 2.5E-01 | 0.68 | 1.43 | 0.99  |
| V00DTNA    | Block Brief 2000: daily nutrients from food, sodium (mg) (calc)                         | 100.0 | 4.6E-05 | 1.5E-05 | 9.5E-01 | 1.2E-01 | 0.75 | 1.31 | 0.99  |
| V00DTCALC  | Block Brief 2000: daily nutrients from food, calcium (mg) (calc)                        | 100.0 | 5.8E-05 | 7.6E-04 | 6.6E-01 | 6.8E-04 | 0.92 | 1.38 | 0.76  |
| V00DTSFAT  | Block Brief 2000: daily nutrients from food, saturated fat (g) (calc)                   | 100.0 | 7.2E-05 | 3.5E-05 | 1.6E-01 | 5.1E-01 | 0.70 | 1.31 | 1.05  |
| V00DTFAT   | Block Brief 2000: daily nutrients from food, total fat (g) (calc)                       | 100.0 | 1.0E-04 | 4.6E-05 | 2.7E-01 | 3.8E-01 | 0.71 | 1.32 | 1.04  |
| V00DTANZN  | Block Brief 2000: daily nutrients from food, zinc from animal sources (mg) (calc)       | 100.0 | 1.1E-04 | 7.0E-05 | 1.0E+00 | 5.0E-02 | 0.78 | 1.42 | 0.87  |
| V00FIBGRN  | Block Brief 2000: daily dietary fiber from grains (g) (calc)                            | 100.0 | 1.2E-04 | 2.9E-04 | 1.0E+00 | 5.1E-03 | 0.82 | 1.38 | 0.86  |
| V00DTLIN   | Block Brief 2000: daily nutrients from food, polyunsaturated fat (g) (calc)             | 100.0 | 1.8E-04 | 8.6E-05 | 1.0E+00 | 6.7E-02 | 0.73 | 1.34 | 0.99  |
| V00SUPCA   | Block Brief 2000: average daily nutrients from vitamin supplements, calcium (mg) (calc) | 100.0 | 2.1E-04 | 1.0E+00 | 9.5E-04 | 2.0E-04 | 1.54 | 1.25 | 0.44  |
| V00NUMSTOP | Q4.400-meter walk: total number rest stops                                              | 87.4  | 2.2E-04 | 1.5E-01 | 2.1E-04 | 7.0E-02 | 0.00 | 0.30 | 13.33 |
| V00DTOLEC  | Block Brief 2000: daily nutrients from food, monounsaturated fat (g) (calc)             | 100.0 | 2.3E-04 | 1.1E-04 | 2.3E-01 | 5.7E-01 | 0.69 | 1.30 | 1.07  |
| V00SRVFAT  | Block Brief 2000: daily servings of fats, oils, sweets and sodas (calc)                 | 100.0 | 2.4E-04 | 3.0E-04 | 1.0E+00 | 1.7E-02 | 0.80 | 1.35 | 0.90  |
| P01BMI     | Body mass index (calc)                                                                  | 100.0 | 3.0E-04 | 1.7E-02 | 8.4E-04 | 2.5E-01 | 0.91 | 1.01 | 1.09  |
| V00STEPST2 | Q2.20-meter walk: trial 2 number of steps                                               | 96.3  | 3.0E-04 | 1.4E-01 | 4.0E-04 | 2.7E-02 | 0.93 | 0.99 | 1.08  |
| V00DTB12   | Block Brief 2000: daily nutrients from food, vitamin B12 (ug) (calc)                    | 100.0 | 4.2E-04 | 1.7E-03 | 1.0E+00 | 4.6E-03 | 0.87 | 1.44 | 0.76  |
| V00PCTALCH | Block Brief 2000: daily percent of calories from alcoholic beverages (kcal) (calc)      | 100.0 | 4.2E-04 | 1.7E-03 | 7.7E-03 | 1.0E+00 | 1.49 | 0.65 | 0.97  |
| V00WKHR7CV | Occupational activities: number of hours worked, past 7 days (calc)                     | 100.0 | 5.3E-04 | 1.0E+00 | 7.8E-04 | 1.1E-03 | 1.66 | 1.26 | 0.38  |
| V00STEPST1 | Q1.20-meter walk: trial 1 number of steps                                               | 97.7  | 5.9E-04 | 7.9E-02 | 7.5E-04 | 1.0E-01 | 0.92 | 1.02 | 1.06  |
| V00SRVGRN  | Block Brief 2000: daily servings of bread, cereals, rice and pasta (calc)               | 100.0 | 7.3E-04 | 5.2E-04 | 1.0E+00 | 8.1E-02 | 0.79 | 1.33 | 0.93  |
| V00SRVDRY  | Block Brief 2000: daily servings of milk, yogurt and cheese (calc)                      | 100.0 | 1.6E-03 | 1.0E-01 | 1.0E-01 | 2.3E-03 | 1.04 | 1.38 | 0.66  |
| V00DTLYC   | Block Brief 2000: daily nutrients from food, lycopene (carotenoid) (ug) (calc)          | 100.0 | 2.2E-03 | 3.2E-02 | 5.0E-01 | 4.5E-03 | 0.89 | 1.39 | 0.79  |
| V00400MTIM | 400-meter walk: total time at 400-m or at stop (sec) (calc)                             | 87.4  | 3.1E-03 | 2.0E-01 | 7.6E-03 | 4.8E-02 | 0.89 | 0.95 | 1.17  |
| V00DTRET   | Block Brief 2000: daily nutrients from food, retinol (preformed Vit. A, ug) (calc)      | 100.0 | 3.5E-03 | 8.1E-02 | 3.6E-01 | 4.0E-03 | 0.98 | 1.34 | 0.74  |
| V00PASE    | Physical Activity Scale for the Elderly (PASE) score (calc)                             | 100.0 | 6.0E-03 | 1.0E+00 | 7.5E-03 | 1.5E-02 | 1.20 | 1.18 | 0.68  |
| V00COMORB  | Comorbidity Score (calc)                                                                | 98.6  | 7.1E-03 | 1.8E-01 | 6.2E-03 | 4.1E-01 | 0.46 | 0.94 | 1.96  |
| V00HRB4WLK | 400-meter walk: heart rate before walk                                                  | 87.9  | 7.7E-03 | 5.4E-02 | 1.8E-02 | 1.0E+00 | 0.92 | 1.02 | 1.07  |
| V00DTCRYP  | Block Brief 2000: daily nutrients from food, cryptoxanthin (carotenoid) (ug) (calc)     | 100.0 | 9.5E-03 | 1.8E-02 | 1.0E+00 | 5.6E-02 | 0.80 | 1.45 | 0.83  |
| V00SMKPKYR | Pack-years of smoking cigarettes (calc)                                                 | 94.4  | 9.5E-03 | 3.9E-01 | 8.2E-03 | 2.2E-01 | 0.55 | 0.88 | 1.82  |
| V00AGE     | Age (calc, used for study eligibility)                                                  | 100.0 | 2.0E-02 | 1.0E+00 | 2.1E-02 | 8.8E-02 | 1.05 | 1.02 | 0.93  |

|            |                                                                                                                            |       |         |         |         |         |      |      |      |
|------------|----------------------------------------------------------------------------------------------------------------------------|-------|---------|---------|---------|---------|------|------|------|
| V00SUPFE   | Block Brief 2000: average daily nutrients from vitamin supplements, iron (mg) (calc)                                       | 100.0 | 2.4E-02 | 1.0E+00 | 8.4E-02 | 2.0E-02 | 1.17 | 1.16 | 0.72 |
| P01WEIGHT  | Current scale weight (kg) (calc)                                                                                           | 100.0 | 4.3E-02 | 2.6E-01 | 5.8E-02 | 1.0E+00 | 0.93 | 1.01 | 1.06 |
| V00PCTPROT | Block Brief 2000: daily percent of calories from protein (kcal) (calc)                                                     | 100.0 | 4.3E-02 | 5.8E-01 | 3.3E-01 | 4.6E-02 | 1.03 | 1.08 | 0.90 |
| V00BPDIAS  | Q6.Blood pressure: diastolic (mm Hg)                                                                                       | 100.0 | 4.5E-02 | 2.3E-01 | 7.5E-02 | 1.0E+00 | 0.95 | 1.00 | 1.05 |
| V00DTCAFFN | Block Brief 2000: daily nutrients from food, caffeine (mg) (calc)                                                          | 100.0 | 4.6E-02 | 1.0E+00 | 4.7E-02 | 2.4E-01 | 0.44 | 0.69 | 2.60 |
| V00ABCIRC  | Abdominal circumference (cm) (calc)                                                                                        | 98.1  | 5.5E-02 | 1.5E-01 | 1.6E-01 | 1.0E+00 | 0.96 | 1.00 | 1.03 |
| V00RPAVG   | Radial pulse: average beats per minute                                                                                     | 100.0 | 6.9E-02 | 9.7E-02 | 3.3E-01 | 1.0E+00 | 0.95 | 1.03 | 1.03 |
| V00WTMAXKG | Maximum adult weight, self-reported (kg) (calc)                                                                            | 98.6  | 7.3E-02 | 1.3E-01 | 2.7E-01 | 1.0E+00 | 0.94 | 1.02 | 1.04 |
| V00HR400WK | 400-meter walk: heart rate at 400-m or at stop                                                                             | 87.4  | 7.6E-02 | 8.0E-02 | 7.2E-01 | 1.0E+00 | 0.95 | 1.03 | 1.01 |
| V00400MTR  | 400-meter walk: total meters walked (calc)                                                                                 | 87.4  | 8.1E-02 | 8.5E-01 | 7.6E-02 | 6.4E-01 | 1.05 | 1.02 | 0.93 |
| V00RLWGT   | Q5.Isometric strength: right leg weight (N)                                                                                | 81.4  | 1.0E-01 | 1.8E-01 | 1.0E+00 | 2.5E-01 | 1.04 | 0.90 | 1.06 |
| V00PCTFAT  | Block Brief 2000: daily percent of calories from fat (kcal) (calc)                                                         | 100.0 | 1.0E-01 | 6.9E-01 | 1.4E-01 | 6.9E-01 | 0.95 | 1.00 | 1.05 |
| V00BAPPROT | Block Brief 2000: daily percent of calories from protein, alcoholic beverages excluded from denominator (kcal) (calc)      | 100.0 | 1.3E-01 | 1.0E+00 | 2.5E-01 | 1.7E-01 | 1.04 | 1.06 | 0.90 |
| V00BAPFAT  | Block Brief 2000: daily percent of calories from fat, alcoholic beverages excluded from denominator (kcal) (calc)          | 100.0 | 1.4E-01 | 1.0E+00 | 1.7E-01 | 2.9E-01 | 0.97 | 0.98 | 1.06 |
| V00BPSYS   | Q6.Blood pressure: systolic (mm Hg)                                                                                        | 100.0 | 1.8E-01 | 1.0E+00 | 2.4E-01 | 3.9E-01 | 0.98 | 0.98 | 1.04 |
| V00LLWGT   | Q16.Isometric strength: left leg weight (N)                                                                                | 81.4  | 2.2E-01 | 7.9E-01 | 1.0E+00 | 2.7E-01 | 1.01 | 0.92 | 1.08 |
| V00RX30NUM | Q49a.MIF: total number of medications recorded                                                                             | 89.3  | 2.2E-01 | 2.6E-01 | 9.3E-01 | 1.0E+00 | 0.84 | 1.08 | 1.09 |
| V00DTVITD  | Block Brief 2000: daily nutrients from food, vitamin D (IU) (calc)                                                         | 100.0 | 2.5E-01 | 1.0E+00 | 7.8E-01 | 3.1E-01 | 0.97 | 1.20 | 0.85 |
| P01HEIGHT  | Average height (mm) (calc)                                                                                                 | 98.6  | 2.7E-01 | 7.7E-01 | 4.3E-01 | 1.0E+00 | 1.01 | 1.00 | 0.99 |
| V00HT25MM  | Height at age 25, self-reported (mm) (calc)                                                                                | 96.3  | 2.8E-01 | 5.1E-01 | 6.3E-01 | 1.0E+00 | 1.01 | 1.00 | 0.99 |
| P01BPDAYCV | How many days limit activities due to back pain, past 30 days (calc)                                                       | 100.0 | 3.1E-01 | 1.0E+00 | 3.8E-01 | 1.0E+00 | 1.05 | 1.01 | 0.94 |
| V00PCTSWT  | Block Brief 2000: daily percent of calories from sweets, desserts (kcal) (calc)                                            | 100.0 | 3.6E-01 | 1.0E+00 | 1.0E+00 | 4.7E-01 | 0.82 | 0.74 | 1.56 |
| V00BAPCARB | Block Brief 2000: daily percent of calories from carbohydrate, alcoholic beverages excluded from denominator (kcal) (calc) | 100.0 | 4.0E-01 | 1.0E+00 | 5.6E-01 | 9.9E-01 | 1.02 | 1.01 | 0.97 |
| P01BPTOT   | Total days in bed and/or limited activity due to back pain, past 30 days (calc)                                            | 100.0 | 4.6E-01 | 1.0E+00 | 7.4E-01 | 7.9E-01 | 0.96 | 0.97 | 1.07 |
| V00WTMINKG | Minimum adult weight, self-reported (kg) (calc)                                                                            | 99.1  | 6.1E-01 | 1.0E+00 | 9.9E-01 | 1.0E+00 | 1.03 | 1.01 | 0.96 |
| V00DTDAID  | Block Brief 2000: daily nutrients from food, daidzein (ug) (calc)                                                          | 100.0 | 6.4E-01 | 1.0E+00 | 1.0E+00 | 1.0E+00 | 0.61 | 0.47 | 2.72 |
| V00DTGEN   | Block Brief 2000: daily nutrients from food, genistein (ug) (calc)                                                         | 100.0 | 6.4E-01 | 1.0E+00 | 1.0E+00 | 1.0E+00 | 0.61 | 0.47 | 2.72 |
| V00PCTCARB | Block Brief 2000: daily percent of calories from carbohydrate (kcal) (calc)                                                | 100.0 | 6.5E-01 | 1.0E+00 | 1.0E+00 | 1.0E+00 | 1.01 | 1.01 | 0.98 |
| V00PSMKYR  | Years of smoking pipe, cigars or cigarillos (calc)                                                                         | 89.8  | 9.6E-01 | 1.0E+00 | 1.0E+00 | 1.0E+00 | 1.59 | 1.85 | 0.17 |
| V00WT25KG  | Weight at age 25, self-reported (kg) (calc)                                                                                | 99.5  | 9.6E-01 | 1.0E+00 | 1.0E+00 | 1.0E+00 | 1.01 | 0.99 | 1.01 |
