# Supplementary material for: Socioeconomic status, mental health, and nutrition are the principal traits for low back pain phenotyping: Data from the osteoarthritis initiative
Source: PubMed Central journal article supplement — JOR Spine. 2023 Feb 14;6(2):e1248. doi: 10.1002/jsp2.1248 (PMC10285761; doi:10.1002/jsp2.1248), 2023-02-14
Supplement: JSP2-6-e1248-s004.pdf [file JSP2-6-e1248-s004.pdf]

**Supplementary Table 1 - Survival analysis - Episode of severe LBP (Hazard ratios listed with 95%CI)**

| <b>No LBP (at enrollment, ref)</b> |                |               |                 |
|------------------------------------|----------------|---------------|-----------------|
| <i>Year</i>                        | <i>At Risk</i> | <i>Events</i> | <i>Censored</i> |
| 0                                  | 4448           | 0             | 0               |
| 1                                  | 4233           | 17            | 201             |
| 2                                  | 4092           | 50            | 122             |
| 3                                  | 3948           | 41            | 131             |
| 4                                  | 3698           | 63            | 226             |
| 6                                  | 3375           | 57            | 279             |
| 8                                  | 1438           | 63            | 1800            |

| <b>Cluster 1 (High SES, HR = 10.7 [7.4, 15.5] )</b> |                |               |                 |
|-----------------------------------------------------|----------------|---------------|-----------------|
| <i>Year</i>                                         | <i>At Risk</i> | <i>Events</i> | <i>Censored</i> |
| 0                                                   | 93             | 0             | 0               |
| 1                                                   | 86             | 25            | 4               |
| 2                                                   | 83             | 6             | 2               |
| 3                                                   | 80             | 12            | 1               |
| 4                                                   | 74             | 6             | 4               |
| 6                                                   | 62             | 4             | 10              |
| 8                                                   | 24             | 7             | 34              |

| <b>Cluster 2 (Intermediate SES, HR = 18.0 [13.2, 24.5])</b> |                |               |                 |
|-------------------------------------------------------------|----------------|---------------|-----------------|
| <i>Year</i>                                                 | <i>At Risk</i> | <i>Events</i> | <i>Censored</i> |
| 0                                                           | 81             | 0             | 0               |
| 1                                                           | 73             | 34            | 4               |
| 2                                                           | 70             | 11            | 2               |
| 3                                                           | 59             | 12            | 10              |
| 4                                                           | 57             | 9             | 1               |
| 6                                                           | 52             | 12            | 4               |
| 8                                                           | 26             | 11            | 17              |

| <b>Cluster 3 (Low SES, HR = 30.9 [22.6, 42.2])</b> |                |               |                 |
|----------------------------------------------------|----------------|---------------|-----------------|
| <i>Year</i>                                        | <i>At Risk</i> | <i>Events</i> | <i>Censored</i> |
| 0                                                  | 40             | 0             | 0               |
| 1                                                  | 34             | 27            | 3               |
| 2                                                  | 30             | 9             | 2               |
| 3                                                  | 29             | 8             | 1               |
| 4                                                  | 36             | 8             | 2               |
| 6                                                  | 20             | 9             | 5               |
| 8                                                  | 7              | 7             | 9               |
