# Supplementary material for: Socioeconomic status, mental health, and nutrition are the principal traits for low back pain phenotyping: Data from the osteoarthritis initiative
Source: PubMed Central journal article supplement — JOR Spine. 2023 Feb 14;6(2):e1248. doi: 10.1002/jsp2.1248 (PMC10285761; doi:10.1002/jsp2.1248), 2023-02-14
Supplement: JSP2-6-e1248-s008.pdf [file JSP2-6-e1248-s008.pdf]

**Supplementary Table 6. Statistical comparisons to determine differences between acute and chronic pain groups: categorical variables**

No variables met significance criteria. Multiple comparisons were performed with Fisher's exact test. P values displayed here have not been adjusted. Cramer's V: small: 0.1-0.3; medium: 0.3-0.5; large: >0.5.

| Variable   | Description                                                                                                                                     | % Complete | P value | Cramer's V |
|------------|-------------------------------------------------------------------------------------------------------------------------------------------------|------------|---------|------------|
| V00CEMPLOY | Current employment (calc)                                                                                                                       | 100.0      | 2.0E-03 | 0.35       |
| V00CUREMP  | Q45.Currently work for pay (include self employed work for pay; answer Yes if on leave from work, expect to return within 6 months)             | 100.0      | 8.7E-03 | 0.26       |
| V00DISCOMF | Q12.400-meter walk: any discomfort                                                                                                              | 94.4       | 1.9E-02 | 0.25       |
| V00RX30    | Q49.MIF: bring in or identify all prescription medications taken, past 30 days                                                                  | 100.0      | 2.5E-02 | 0.25       |
| P01OADEGCV | Doctor said you had osteoarthritis/degenerative arthritis in knee (calc)                                                                        | 97.7       | 2.8E-02 | 0.24       |
| V00NARCOT  | Q50e.Used strong prescription pain medications (e.g., narcotics) for joint pain or arthritis more than half the days of the month, past 30 days | 100.0      | 2.8E-02 | 0.22       |
| V00PNMEDT  | Q51.Take any pain medication today (include both prescription and over-the-counter med                                                          | 100.0      | 4.3E-02 | 0.20       |
| V00FALL    | Fallen and landed on floor or ground, past 12 months                                                                                            | 99.5       | 4.4E-02 | 0.20       |
| V00RXNSAID | MIF: Rx NSAID use indicator (calc)                                                                                                              | 100.0      | 5.3E-02 | 0.20       |
| V00RUBCV   | CAM: currently using rubs, lotions, liniments, creams or oils for arthritis or joint pain (calc)                                                | 100.0      | 5.9E-02 | 0.19       |
| P01OABCKCV | Doctor said you had osteoarthritis/degenerative arthritis in back/neck (calc)                                                                   | 98.1       | 6.6E-02 | 0.19       |
| V00PA530   | Q31.Get in and out of squatting position 10 or more times during single day, past 30 days                                                       | 100.0      | 6.8E-02 | 0.20       |
| P01KPR12CV | Right knee pain, aching or stiffness: more than half the days of a month, past 12 months (calc)                                                 | 100.0      | 7.0E-02 | 0.19       |
| V00RXANALG | MIF: Rx Analgesic use indicator (calc)                                                                                                          | 100.0      | 7.1E-02 | 0.19       |
| P01LH5CV   | Left hand exam: joint 5 (calc)                                                                                                                  | 100.0      | 7.8E-02 | 0.18       |
| V00RXCHOND | MIF: Rx Chondroitin sulfate use indicator (calc)                                                                                                | 100.0      | 1.0E-01 | 0.00       |
| V00RXGLCSM | MIF: Rx Glucosamine use indicator (calc)                                                                                                        | 100.0      | 1.0E-01 | 0.00       |
| V00SAFEWLK | Q12.400-meter walk eligibility: feel it would be safe to try to walk up and down hallway                                                        | 94.9       | 1.0E-01 | 0.00       |
| V00LIVDAM  | Charlson Comorbidity: have cirrhosis or serious liver damage                                                                                    | 96.7       | 1.0E-01 | 0.00       |
| V00CANCER  | Charlson Comorbidity: have cancer, other than skin cancer, leukemia or lymphoma                                                                 | 98.1       | 1.0E-01 | 0.00       |
| P01BROKRCV | Brother had knee replacement surgery (calc)                                                                                                     | 99.5       | 1.0E-01 | 0.00       |
| V00WLK20T1 | Q1.20-meter walk: trial 1 result                                                                                                                | 99.5       | 1.0E-01 | 0.00       |
| V00W20COMP | Q1.400-meter walk eligibility: able to complete trial 1 and trial 2 of the 20-meter walk                                                        | 99.1       | 1.0E-01 | 0.00       |
| V00WLK20T2 | Q2.20-meter walk: trial 2 result                                                                                                                | 99.5       | 1.0E-01 | 0.00       |
| V00WORK7   | Occupational activities: work (pay/volunteer), past 7 days                                                                                      | 100.0      | 1.1E-01 | 0.18       |

|            |                                                                                                                  |       |         |      |
|------------|------------------------------------------------------------------------------------------------------------------|-------|---------|------|
| V00BONEFX  | Doctor ever said you broke or fractured bone after age 45                                                        | 99.1  | 1.1E-01 | 0.17 |
| V00VIT1    | Regular Once-A-Day/Centrum/Thera type multiple vitamins, taken past 30 days                                      | 99.5  | 1.1E-01 | 0.16 |
| P01ARTHOTH | Q10.Doctor ever said you have some other type of arthritis                                                       | 99.5  | 1.1E-01 | 0.16 |
| V00HLTHCOV | Currently have any kind of health care coverage                                                                  | 100.0 | 1.3E-01 | 0.16 |
| V00VIT8    | Folic acid, folate single vitamin, taken past 30 days                                                            | 98.1  | 1.4E-01 | 0.16 |
| V00SAME    | Q50f.Used SAMe (S-adenosylmethionine) for joint pain or arthritis more than half the day                         | 100.0 | 1.4E-01 | 0.18 |
| V00HOMECV  | CAM: seen homeopathy/ homeopathic treatment practitioner for arthritis or joint pain, past 12 months (calc)      | 99.5  | 1.4E-01 | 0.18 |
| V00HOUACT6 | Household activities: caring for another person, past 7 days                                                     | 100.0 | 1.4E-01 | 0.15 |
| V00LUNG    | Charlson Comorbidity: have emphysema, chronic bronchitis, or chronic obstructive lung disease (also called COPD) | 96.7  | 1.6E-01 | 0.15 |
| V00ASTHMA  | Charlson Comorbidity: have asthma                                                                                | 97.7  | 1.6E-01 | 0.15 |
| P01RAIA    | Q1.Doctor ever said you have rheumatoid arthritis or other inflammatory arthritis                                | 97.2  | 1.7E-01 | 0.16 |
| P01LH2CV   | Left hand exam: joint 2 (calc)                                                                                   | 98.6  | 1.8E-01 | 0.14 |
| V00HOUACT3 | Household activities: home repairs, past 7 days                                                                  | 100.0 | 1.8E-01 | 0.14 |
| P01RH5CV   | Right hand exam: joint 5 (calc)                                                                                  | 100.0 | 1.9E-01 | 0.14 |
| V00MARITST | Marital status                                                                                                   | 100.0 | 1.9E-01 | 0.24 |
| V00DIAB    | Charlson Comorbidity: have diabetes (high blood sugar)                                                           | 98.1  | 2.0E-01 | 0.15 |
| P01RH1CV   | Right hand exam: joint 1 (calc)                                                                                  | 99.5  | 2.1E-01 | 0.13 |
| V00RXNARC  | MIF: Rx Narcotic analgesic use indicator (calc)                                                                  | 100.0 | 2.1E-01 | 0.13 |
| V00INCOME2 | Yearly income (>50K or <50K) (calc)                                                                              | 97.7  | 2.1E-01 | 0.14 |
| P01RASTASV | RA/other inflammatory arthritis diagnosis and medication status, self-report (calc)                              | 100.0 | 2.4E-01 | 0.17 |
| P01GOUTCV  | Doctor said you had gout (calc)                                                                                  | 99.5  | 2.5E-01 | 0.13 |
| V00400MCMP | 400-meter walk: completion status (calc)                                                                         | 99.1  | 2.6E-01 | 0.21 |
| V00COMP10  | Q11.400-meter walk: complete full 10 laps                                                                        | 99.1  | 2.7E-01 | 0.12 |
| P02RACE    | Racial background, self-reported (calc)                                                                          | 99.1  | 2.8E-01 | 0.15 |
| V00WLKAID  | Q3.20-meter walk: using walking aid such as cane                                                                 | 99.1  | 2.9E-01 | 0.13 |
| V00SPNFX   | Doctor ever said you fractured spine or vertebrae                                                                | 99.1  | 2.9E-01 | 0.15 |
| V00RXVLCXB | MIF: Rx Valdecoxib use indicator (calc)                                                                          | 100.0 | 2.9E-01 | 0.15 |
| V00HRTFAIL | Charlson Comorbidity: ever treated for heart failure                                                             | 98.1  | 3.0E-01 | 0.16 |
| V00FFQ67   | Block Brief 2000: glasses of milk, when drink what kind usually drink                                            | 100.0 | 3.0E-01 | 0.24 |
| P01RH2CV   | Right hand exam: joint 2 (calc)                                                                                  | 100.0 | 3.0E-01 | 0.11 |
| V00VIT9    | Calcium or Tums (alone or combined with vitamin D or magnesium), taken past 30 days                              | 98.6  | 3.1E-01 | 0.12 |
| P01HPR12CV | Right hip pain, aching or stiffness: more than half the days of a month, past 12 months (calc)                   | 100.0 | 3.2E-01 | 0.11 |
| P01RH3CV   | Right hand exam: joint 3 (calc)                                                                                  | 99.5  | 3.4E-01 | 0.10 |

|            |                                                                                                                                            |       |         |      |
|------------|--------------------------------------------------------------------------------------------------------------------------------------------|-------|---------|------|
| P01OAHNDCV | Doctor said you had osteoarthritis/ degenerative arthritis in hand/fingers (calc)                                                          | 99.1  | 3.6E-01 | 0.11 |
| P01OAOTHCV | Doctor said you had osteoarthritis/ degenerative arthritis in some other joint (calc)                                                      | 99.1  | 3.6E-01 | 0.11 |
| V00VIT5    | Beta-carotene single vitamin, taken past 30 days                                                                                           | 98.1  | 3.7E-01 | 0.10 |
| P02JBMPCV  | Hard bumps on fingers of right hand, left hand or both hands (calc, if=3 used for study eligibility)                                       | 100.0 | 3.7E-01 | 0.17 |
| V00RXRALOX | MIF: Rx Raloxifene use indicator (calc)                                                                                                    | 100.0 | 3.8E-01 | 0.13 |
| P02STMED   | Q23.Participating in any research study that includes taking medications or supplements                                                    | 100.0 | 3.8E-01 | 0.13 |
| P02STMEDCV | Q23a.Told what study medications taken for research study (calc)                                                                           | 100.0 | 3.8E-01 | 0.13 |
| P02HISP    | Hispanic or Latino, self-reported                                                                                                          | 100.0 | 3.8E-01 | 0.13 |
| V00HR135   | Q9.400-meter walk: heart rate exceed 135 bpm during walk                                                                                   | 94.4  | 3.8E-01 | 0.10 |
| V00HRTAT   | Charlson Comorbidity: ever had heart attack                                                                                                | 97.7  | 3.9E-01 | 0.13 |
| P02PA4     | Q14d.Lift or move objects weighing 25 lbs. or more by hand on most days                                                                    | 100.0 | 4.0E-01 | 0.10 |
| V00CHIRCV  | CAM: seen chiropractic care practitioner for arthritis or joint pain, past 12 months (calc)                                                | 99.5  | 4.0E-01 | 0.10 |
| V00VITM12  | Q61.CAM: use vitamins or minerals, such as selenium or vitamin C or D, for arthritis or joint pain past 12 months                          | 100.0 | 4.0E-01 | 0.09 |
| P01CLAU    | Q4.Have claustrophobia                                                                                                                     | 99.1  | 4.0E-01 | 0.09 |
| V00HERB12  | Q62.CAM: use herbs, such as echinacea, ginger or garlic, for arthritis or joint pain, past 12 months                                       | 100.0 | 4.1E-01 | 0.11 |
| V00HERBCV  | CAM: currently using any herbs for arthritis or joint pain (calc)                                                                          | 100.0 | 4.1E-01 | 0.11 |
| P02PA1     | Q14a.Climb up total of 10 or more flights of stairs on most days                                                                           | 100.0 | 4.2E-01 | 0.09 |
| P01LH3CV   | Left hand exam: joint 3 (calc)                                                                                                             | 100.0 | 4.2E-01 | 0.08 |
| P01KPL12CV | Left knee pain, aching or stiffness: more than half the days of a month, past 12 months (calc)                                             | 100.0 | 4.2E-01 | 0.09 |
| P02FAMHXKR | Q15.Mother, father, sister, or brother (blood relative) had knee repl surgery where all/part of knee replaced (used for study eligibility) | 99.5  | 4.4E-01 | 0.09 |
| P01TJE30CV | TMJ: jaw joint or in front of ear, experienced pain or aching, past 30 days (calc)                                                         | 100.0 | 4.5E-01 | 0.09 |
| V00MEDINS  | Have any health insurance plan that pays for all or part of cost of prescription medicines                                                 | 98.6  | 4.6E-01 | 0.08 |
| V00PIPE    | Ever smoked pipe, cigars or cigarillos                                                                                                     | 100.0 | 4.6E-01 | 0.08 |
| P01KPNR12  | Q15.Right knee pain, aching or stiffness: any, past 12 months                                                                              | 100.0 | 4.6E-01 | 0.08 |
| V00HOUACT1 | Household activities: light housework, past 7 days                                                                                         | 100.0 | 4.7E-01 | 0.07 |
| P01TMJE6M  | Q45.TMJ: jaw joint or in front of ear, experienced pain or aching, past 6 months                                                           | 100.0 | 4.7E-01 | 0.08 |
| V00MSM     | Q50g.Used MSM (methylsulfonylmethane) for joint pain or arthritis more than half the days of the month, past 30 days                       | 100.0 | 4.8E-01 | 0.10 |
| V00VIT10   | Zinc alone, taken past 30 days                                                                                                             | 99.1  | 4.8E-01 | 0.09 |
| V00PSMOKER | Smoking status for pipe, cigars or cigarillos (calc)                                                                                       | 99.5  | 5.2E-01 | 0.15 |
| V00BYPLEG  | Charlson Comorbidity: had operation to unclog or bypass arteries in legs                                                                   | 99.5  | 5.3E-01 | 0.11 |
| V00RXCOX2  | MIF: Rx COX-II inhibitor use indicator (calc)                                                                                              | 100.0 | 5.3E-01 | 0.07 |

|            |                                                                                                                                                |       |         |      |
|------------|------------------------------------------------------------------------------------------------------------------------------------------------|-------|---------|------|
| P01TMJF6M  | Q46.TMJ: across face or cheek, experienced pain or aching, past 6 months                                                                       | 100.0 | 5.3E-01 | 0.07 |
| V00NSAIDS  | Q50b.Used nonprescription NSAIDS (e.g., Aspirin, Ibuprofen...) for joint pain or arthritis                                                     | 100.0 | 5.3E-01 | 0.07 |
| P01OTARTCV | Doctor said you had some other type of arthritis (calc)                                                                                        | 98.1  | 5.5E-01 | 0.13 |
| V00PA330   | Q30.Squat 30 minutes or more during single day, past 30 days                                                                                   | 99.5  | 5.5E-01 | 0.06 |
| V00RXRFCXB | MIF: Rx Rofecoxib use indicator (calc)                                                                                                         | 100.0 | 5.6E-01 | 0.10 |
| P01MOMHRCV | Mother had hip replacement surgery (calc)                                                                                                      | 99.5  | 5.6E-01 | 0.10 |
| P01MOMKRCV | Mother had knee replacement surgery (calc)                                                                                                     | 99.5  | 5.6E-01 | 0.10 |
| V00VITMCV  | CAM: currently using vitamins/minerals for arthritis or joint pain (calc)                                                                      | 100.0 | 5.6E-01 | 0.07 |
| V00HLTHCAR | Q7a.Where usually go for health care or advice about health care                                                                               | 100.0 | 5.6E-01 | 0.18 |
| P01LH1CV   | Left hand exam: joint 1 (calc)                                                                                                                 | 100.0 | 6.0E-01 | 0.06 |
| V00VIT3    | Antioxidant combination type multiple vitamins, taken past 30 days                                                                             | 97.7  | 6.1E-01 | 0.06 |
| V00NSAIDRX | Q50c.Used prescription NSAIDS (e.g., Ibuprofen, Diclofenac...) for joint pain or arthritis                                                     | 100.0 | 6.1E-01 | 0.08 |
| V00SPIR12  | CAM: do spiritual activities (e.g., prayer, laying on of hands, healing circles, or faith healing) for arthritis or joint pain, past 12 months | 100.0 | 6.1E-01 | 0.06 |
| V00CSTREP1 | Repeated chair stands: trial 1                                                                                                                 | 97.2  | 6.3E-01 | 0.15 |
| V00FFQ73   | Block Brief 2000: vitamins/minerals, taken regularly (at least once per month), past 12 months                                                 | 100.0 | 6.3E-01 | 0.06 |
| V00DIET12  | Q60.CAM: follow special food plan or diet, such as a vegetarian or low-fat diet, for arthritis or joint pain, past 12 months                   | 100.0 | 6.3E-01 | 0.05 |
| V00CSTREP2 | Repeated chair stands: trial 2                                                                                                                 | 94.9  | 6.4E-01 | 0.15 |
| P01SISKRCV | Sister had knee replacement surgery (calc)                                                                                                     | 99.5  | 6.5E-01 | 0.08 |
| V00VIT4    | Vitamin A (not beta-carotene) single vitamin, taken past 30 days                                                                               | 98.1  | 6.5E-01 | 0.08 |
| V00VIT7    | Vitamin E single vitamin, taken past 30 days                                                                                                   | 99.1  | 6.7E-01 | 0.05 |
| V00ACUTCV  | CAM: seen acupuncture practitioner for arthritis or joint pain, past 12 months (calc)                                                          | 99.5  | 6.7E-01 | 0.06 |
| V00HOUACT5 | Household activities: outdoor gardening, past 7 days                                                                                           | 100.0 | 6.8E-01 | 0.05 |
| P01HPL12CV | Left hip pain, aching or stiffness: more than half the days of a month, past 12 months (calc)                                                  | 100.0 | 6.9E-01 | 0.04 |
| V00PA130   | Q33.Climb up a total of 10 or more flights of stairs during single day, past 30 days (one flight is about 10 steps)                            | 100.0 | 6.9E-01 | 0.04 |
| V00CS5     | Repeated chair stands: able to complete 5 stands (calc)                                                                                        | 99.5  | 7.1E-01 | 0.05 |
| V00BISPHOS | Q58.Taken bisphosphonate medication (includes alendronate, risedronate...) to treat osteoporosis or Paget's disease, past 5 years              | 100.0 | 7.1E-01 | 0.05 |
| V00BISPTY  | Type of bisphosphonate taken, past 5 years (calc)                                                                                              | 100.0 | 7.1E-01 | 0.05 |
| V00ULCER   | Charlson Comorbidity: have stomach ulcers or peptic ulcer disease                                                                              | 98.6  | 7.1E-01 | 0.07 |
| P01TJF30CV | TMJ: across face or cheek, experienced pain or aching, past 30 days (calc)                                                                     | 100.0 | 7.4E-01 | 0.05 |

|            |                                                                                                                                                  |       |         |      |
|------------|--------------------------------------------------------------------------------------------------------------------------------------------------|-------|---------|------|
| P02PA2     | Q14b.Kneel for 30 minutes or more on most days                                                                                                   | 100.0 | 7.6E-01 | 0.05 |
| V00SPIRCV  | CAM: currently do any type of spiritual activities for arthritis or joint pain (calc)                                                            | 100.0 | 7.7E-01 | 0.04 |
| V00YOGACV  | CAM: currently do any type of health or special movement activity for arthritis or joint pain (calc)                                             | 100.0 | 7.8E-01 | 0.06 |
| V00TYLEN   | Q50a.Used Tylenol (Acetaminophen) for joint pain or arthritis more than half the days of the month, past 30 days                                 | 100.0 | 7.8E-01 | 0.04 |
| V00RELA12  | Q66.CAM: do relaxation or mind-body activities, such as meditation, deep breathing or visualization, for arthritis or joint pain, past 12 months | 100.0 | 7.8E-01 | 0.04 |
| V00RELACV  | CAM: currently do relaxation or mind-body activities for arthritis or joint pain (calc)                                                          | 100.0 | 7.8E-01 | 0.04 |
| P01LH4CV   | Left hand exam: joint 4 (calc)                                                                                                                   | 100.0 | 7.8E-01 | 0.04 |
| V00YOGA12  | Q65.CAM: do any health or special movement activity, such as Tai Chi, Yoga, Chi Gong or Pilates, for arthritis or joint pain, past 12 months     | 100.0 | 7.9E-01 | 0.04 |
| V00CSTSGL  | Single chair stand                                                                                                                               | 99.5  | 8.0E-01 | 0.11 |
| V00FFQ5    | Block Brief 2000: cereal, which eat most often                                                                                                   | 98.6  | 8.2E-01 | 0.10 |
| P01HPNL12  | Q39.Left hip pain, aching or stiffness: any, past 12 months (includes pain in groin and in front and sides of upper thigh)                       | 100.0 | 8.4E-01 | 0.03 |
| V00PA430   | Q32.Lift or move objects weighing 25 pounds or more by hand during single day, past 30                                                           | 100.0 | 8.4E-01 | 0.03 |
| P02SEX     | Gender, male or female                                                                                                                           | 100.0 | 8.4E-01 | 0.03 |
| V00HOUACT4 | Household activities: lawn work/yard care, past 7 days                                                                                           | 100.0 | 8.4E-01 | 0.03 |
| V00SMOKER  | Smoking status for cigarettes (calc)                                                                                                             | 99.1  | 9.7E-01 | 0.03 |
| V00RXNTRAT | MIF: Rx Nitrate use indicator (calc)                                                                                                             | 100.0 | 1.0E+00 | 0.04 |
| V00CANEUSE | Q10.400-meter walk: use cane                                                                                                                     | 94.4  | 1.0E+00 | 0.06 |
| P02PA3     | Q14c.Squat or deep knee bend for 30 minutes or more on most days                                                                                 | 99.1  | 1.0E+00 | 0.01 |
| P02JBMP    | Q16.Observe obvious hard bumps on joints closest to fingertips                                                                                   | 100.0 | 1.0E+00 | 0.01 |
| P01ARTDOC  | Q11.Currently seeing doctor or other health care professional for arthritis                                                                      | 100.0 | 1.0E+00 | 0.01 |
| P01FAMKR   | Q13.Mother, father, sister, or brother (blood relative) had knee replacement surgery for arthritis, where all or part of knee joint replaced     | 99.5  | 1.0E+00 | 0.01 |
| P01HRS     | Ever had hip replacement surgery where all or part of joint was replaced                                                                         | 100.0 | 1.0E+00 | 0.04 |
| V00VIT11   | Iron alone, taken past 30 days                                                                                                                   | 99.1  | 1.0E+00 | 0.01 |
| V00VIT12   | Selenium alone, taken past 30 days                                                                                                               | 99.1  | 1.0E+00 | 0.02 |
| V00VIT2    | Stress-tabs/B-Complex type multiple vitamins, taken past 30 days                                                                                 | 100.0 | 1.0E+00 | 0.01 |
| V00HANDED  | Dominant hand for hand x-ray (calc)                                                                                                              | 98.1  | 1.0E+00 | 0.08 |
| V00OTHCAMC | CAM: currently seeing ayurveda/biofeedback/energy healing/hypnosis/ naturopathy practitioner for arthritis or joint pain (calc)                  | 99.1  | 1.0E+00 | 0.08 |

|            |                                                                                                                                                           |       |         |      |
|------------|-----------------------------------------------------------------------------------------------------------------------------------------------------------|-------|---------|------|
| V00OTHCAM  | CAM: seen ayurveda/biofeedback/ energy healing/hypnosis/ naturopathy practitioner for arthritis or joint pain, past 12 months (calc)                      | 99.1  | 1.0E+00 | 0.03 |
| V00HOUACT2 | Household activities: heavy housework, past 7 days                                                                                                        | 100.0 | 1.0E+00 | 0.00 |
| V00RXACTM  | MIF: Rx Acetaminophen use indicator (calc)                                                                                                                | 100.0 | 1.0E+00 | 0.02 |
| V00RXASPRN | MIF: Rx Aspirin use indicator (calc)                                                                                                                      | 100.0 | 1.0E+00 | 0.03 |
| V00RXBISPH | MIF: Rx Bisphosphonate use indicator (calc)                                                                                                               | 100.0 | 1.0E+00 | 0.05 |
| V00RXCLCXB | MIF: Rx Celecoxib use indicator (calc)                                                                                                                    | 100.0 | 1.0E+00 | 0.05 |
| V00RXOSTRD | MIF: Rx Oral corticosteroid use indicator (calc)                                                                                                          | 100.0 | 1.0E+00 | 0.02 |
| V00RXOTHAN | MIF: Rx Other analgesic use indicator (calc)                                                                                                              | 100.0 | 1.0E+00 | 0.08 |
| V00RXSALIC | MIF: Rx Salicylate use indicator (calc)                                                                                                                   | 100.0 | 1.0E+00 | 0.03 |
| V00PA230   | Q29.Kneel 30 minutes or more during single day, past 30 days                                                                                              | 100.0 | 1.0E+00 | 0.02 |
| V00COXIBS  | Q50d.Used COXIBS (e.g., Bextra, Celebrex...) for joint pain or arthritis more than half the days of the month, past 30 days                               | 100.0 | 1.0E+00 | 0.03 |
| V00CHON    | Q52a.Used chondroitin sulfate for joint pain or arthritis, past 6 months                                                                                  | 99.5  | 1.0E+00 | 0.01 |
| V00GLUC    | Q52b.Used glucosamine for joint pain or arthritis, past 6 months                                                                                          | 100.0 | 1.0E+00 | 0.02 |
| V00CAM12   | Q59.CAM: seen someone other than medical doctor or nurse, such as chiropractor or acupuncturist, specifically for arthritis or joint pain, past 12 months | 99.5  | 1.0E+00 | 0.02 |
| V00ACUSCV  | CAM: seen acupressure practitioner for arthritis or joint pain, past 12 months (calc)                                                                     | 99.5  | 1.0E+00 | 0.08 |
| V00MASSCV  | CAM: seen massage practitioner for arthritis or joint pain, past 12 months (calc)                                                                         | 99.5  | 1.0E+00 | 0.03 |
| V00DIETCV  | CAM: currently following special food plan or diet for arthritis or joint pain (calc)                                                                     | 100.0 | 1.0E+00 | 0.02 |
| V00RUBS12  | CAM: used rubs, lotions, liniments, creams or oils, such as tiger balm or horse liniment, for arthritis or joint pain, past 12 months                     | 100.0 | 1.0E+00 | 0.00 |
| V00CAPSNCV | CAM: currently using Capsaicin (pepper cream) for arthritis or joint pain (calc)                                                                          | 100.0 | 1.0E+00 | 0.08 |
| V00BRAC12  | Q64.CAM: worn copper bracelets or used magnets for arthritis or joint pain, past 12 months                                                                | 100.0 | 1.0E+00 | 0.00 |
| V00BRACCV  | CAM: currently wear copper bracelets or use magnets for arthritis or joint pain (calc)                                                                    | 100.0 | 1.0E+00 | 0.01 |
| P02CNCR3   | Q19.Treated for cancer or been told by doctor that you had cancer or malignant tumor, past 3 years                                                        | 99.5  | 1.0E+00 | 0.01 |
| V00STROKE  | Charlson Comorbidity: had stroke, cerebrovascular accident, blood clot or bleeding in brain, or transient ischemic attack (TIA)                           | 98.1  | 1.0E+00 | 0.05 |

|            |                                                                                                                             |       |         |      |
|------------|-----------------------------------------------------------------------------------------------------------------------------|-------|---------|------|
| V00KIDFXN  | Charlson Comorbidity: ever had problem with kidneys, poor kidney function (blood tests showed high creatinine)              | 97.2  | 1.0E+00 | 0.08 |
| V00POLYRH  | Charlson Comorbidity: have polymyalgia rheumatica                                                                           | 93.5  | 1.0E+00 | 0.08 |
| V00SMOKE   | Have you smoked at least 100 cigarettes (5 packs) in entire life                                                            | 99.1  | 1.0E+00 | 0.02 |
| V00DRKMORE | Ever drink more beer, wine or liquor than do now                                                                            | 100.0 | 1.0E+00 | 0.00 |
| P01OAHIPCV | Doctor said you had osteoarthritis/degenerative arthritis in hip (calc)                                                     | 98.1  | 1.0E+00 | 0.01 |
| P01SISHRCV | Sister had hip replacement surgery (calc)                                                                                   | 99.5  | 1.0E+00 | 0.08 |
| P01DADKRCV | Father had knee replacement surgery (calc)                                                                                  | 99.5  | 1.0E+00 | 0.00 |
| P01KPNL12  | Q18.Left knee pain, aching or stiffness: any, past 12 months                                                                | 100.0 | 1.0E+00 | 0.00 |
| P01HPNR12  | Q38.Right hip pain, aching or stiffness: any, past 12 months (includes pain in groin and in front and sides of upper thigh) | 100.0 | 1.0E+00 | 0.02 |
| P01RH4CV   | Right hand exam: joint 4 (calc)                                                                                             | 99.5  | 1.0E+00 | 0.00 |
| V00WALKER  | Q6.400-meter walk eligibility: use walker or quad cane when walk                                                            | 98.1  | 1.0E+00 | 0.08 |
| V00VIT6    | Vitamin C single vitamin, taken past 30 days                                                                                | 99.1  | 1.0E+00 | 0.01 |
| V00VIT13   | Vitamin D (alone or combined with calcium), taken past 30 days                                                              | 99.5  | 1.0E+00 | 0.02 |
