# Supplementary figures and images for: Socioeconomic status, mental health, and nutrition are the principal traits for low back pain phenotyping: Data from the osteoarthritis initiative
Source: PubMed Central journal article supplement — JOR Spine. 2023 Feb 14;6(2):e1248. doi: 10.1002/jsp2.1248 (PMC10285761; doi:10.1002/jsp2.1248), 2023-02-14

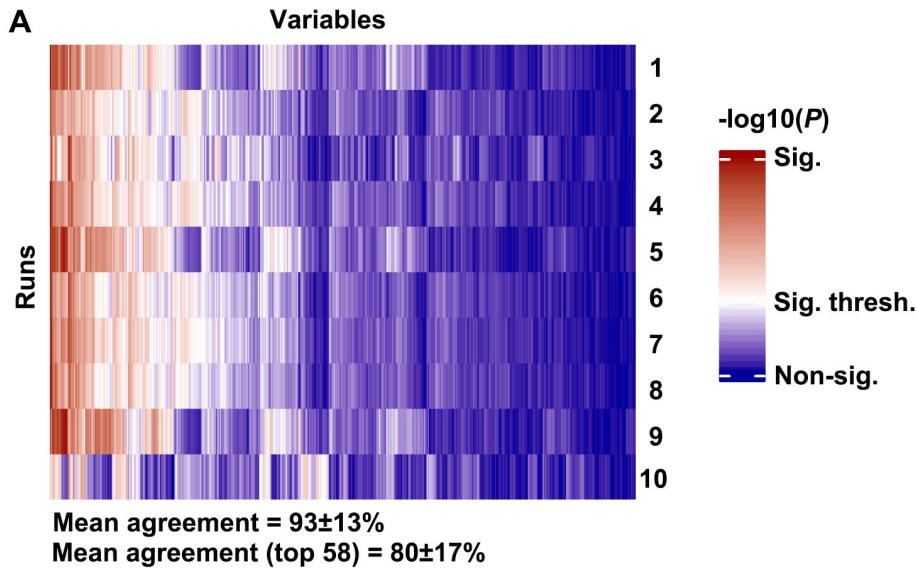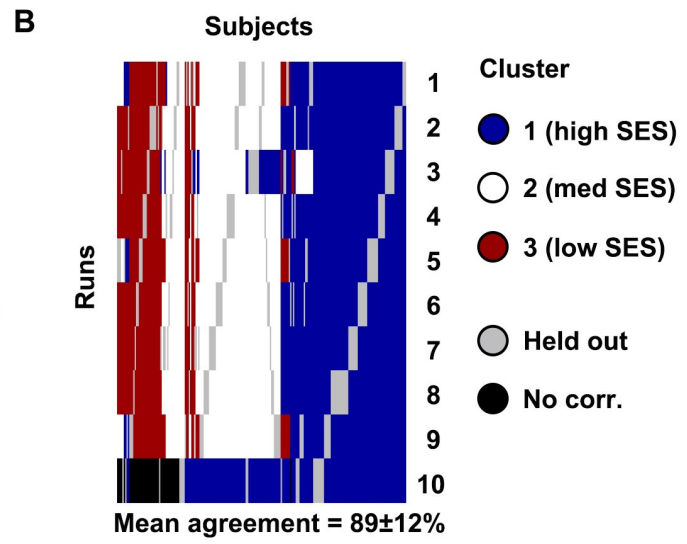

Supplement: JSP2-6-e1248-s002.pdf [file JSP2-6-e1248-s002.pdf]

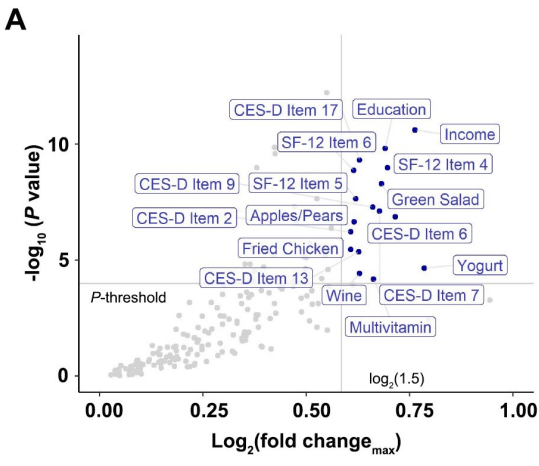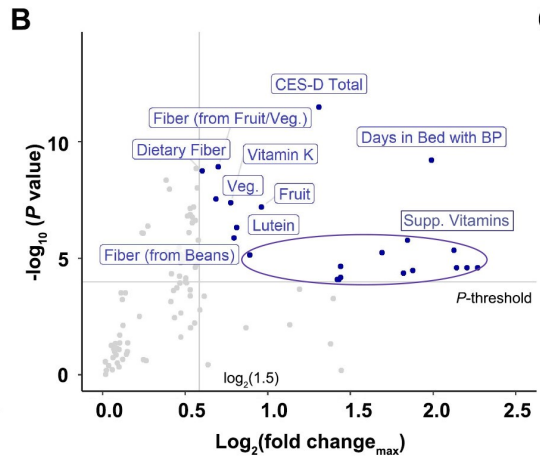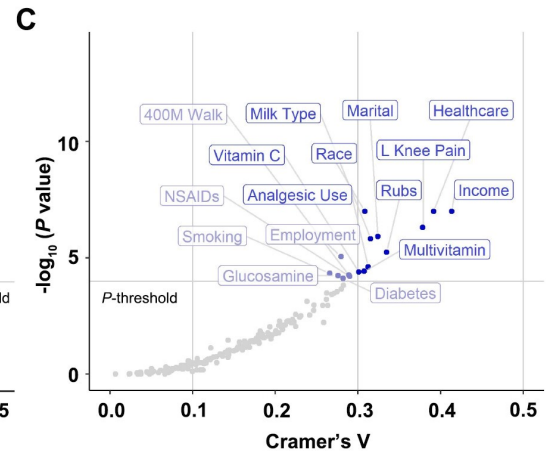

Supplement: JSP2-6-e1248-s005.pdf [file JSP2-6-e1248-s005.pdf]

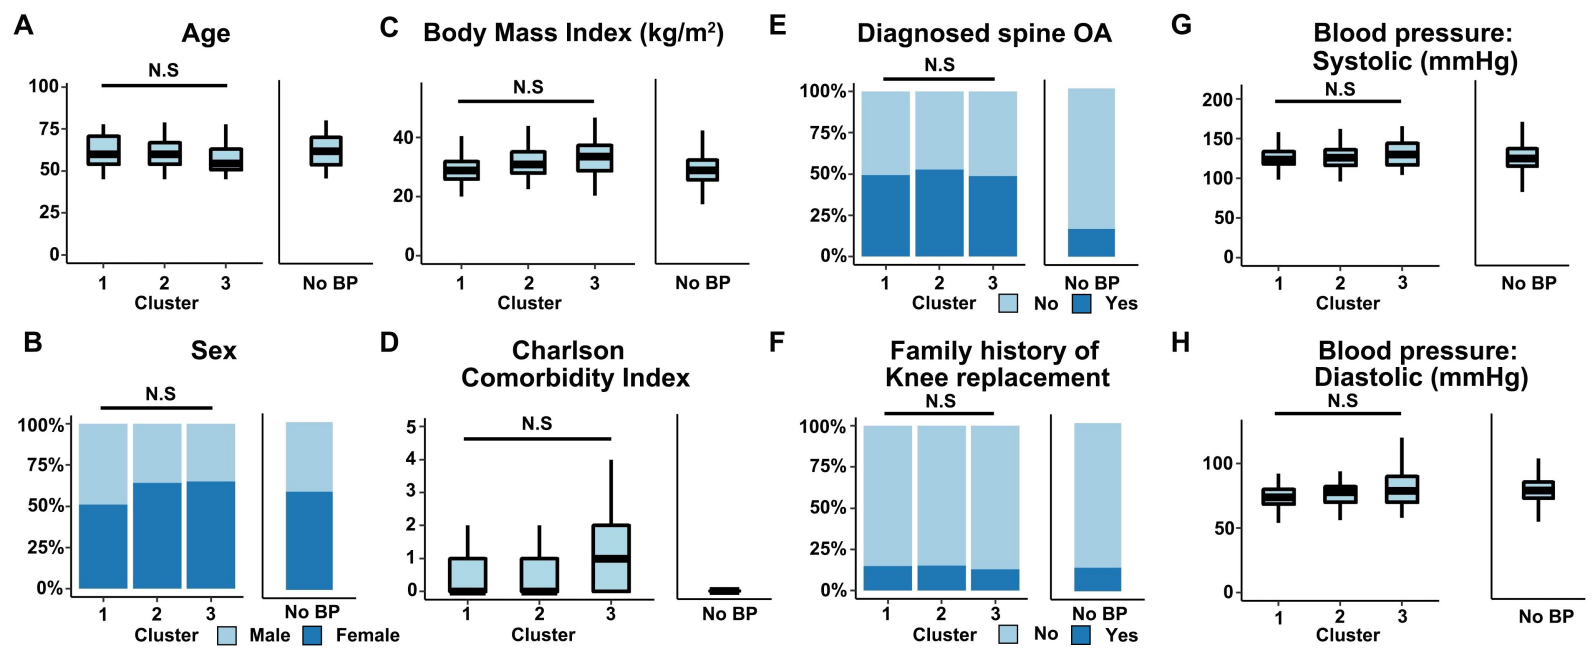

Supplement: JSP2-6-e1248-s007.pdf [file JSP2-6-e1248-s007.pdf]
